# Supplementary material
Source: ML conference proceedings conference paper supplement (https://openreview.net/forum?id=dh_MkX0QfrK)
Supplement: supplementary_material [file attachment]

# PDEBENCH: An Extensive Benchmark for Scientific Machine Learning. Supplementary Material <sup>[10]</sup>

## A Continuation of Related Work

Benchmarks in machine learning are an ubiquitous feature of the field. In recent years, their design and implementation has become a research area of its own right. Easily accessible and widely used image classification benchmarks such as MNIST and ImageNet are widely credited with accelerating progress in machine learning. Various domains in machine learning have widely influential datasets: In time series forecasting there are the Makridakis competitions [36], in reinforcement learning there is the OpenAI Gym [5]. Generic classification problems use, for example, the Penn Machine Learning Benchmark [43].

Closely related to the chosen Scientific ML baselines is the problem of directly differentiating through the numerical solver, which can itself be used in training an approximating model, or to directly solve some optimization or control problem of interest. Differentiable direct PDE solvers are increasingly available, e.g. [37] and frequently built upon neural network technology stacks [13, 3, 18].

Recent efforts have attempted to unify Scientific ML surrogates for PDEs under a single interface. For example, NVIDIA’s MODULUS/SimNet [17] implements a variety of methods in a single framework, although unfortunately under onerous intellectual property restrictions and an opaque contribution process. The DeepXDE project [34] is available under an open license and provides an impressive range of capabilities, but is largely restricted to PINN and DeepONet methods [47].

## B Detailed metrics description

The classic loss metrics we use are (1) root-mean-squared-error (RMSE), (2) normalized RMSE (nRMSE), (3) maximum error. These measure the emulating model’s global performance but neglect local performance. Thus we include extra metrics to measure specific failure modes: (4) RMSE of the conserved value (cRMSE), (5) RMSE at boundaries (bRMSE), (6) RMSE in Fourier space (fRMSE) constrained to low, middle, and high-frequency regions.

The normalized RMSE is a variant of the RMSE to provide scale-independent information defined as:

$$\text{nRMSE} \equiv \sqrt{\frac{\|u_{\text{pred}} - u_{\text{true}}\|_2}{\|u_{\text{true}}\|_2}}, \tag{4}$$

where  $\|u\|_2$  is the  $L_2$ -norm of a (vector-valued) variable  $u$ , and  $u_{\text{true}}, u_{\text{pred}}$  are true and predicted value, respectively. The maximum error measures the model’s worst prediction, which quantifies both local performance and models’ stability of their prediction. cRMSE is defined as  $\text{nRMSE} \equiv \|\sum u_{\text{pred}} - \sum u_{\text{true}}\|_2/N$ , which measure the deviation of the prediction from some physically conserved value. bRMSE measures the error at the boundary, indicating if the model understand the boundary condition properly. Finally, fRMSE measures the error in low/middle/high-frequency ranges defined as

$$\sqrt{\frac{\sum_{k_{\min}}^{k_{\max}} |\mathcal{F}(u_{\text{pred}}) - \mathcal{F}(u_{\text{true}})|^2}{k_{\max} - k_{\min} + 1}}, \tag{5}$$

where  $\mathcal{F}$  is a discrete Fourier transformation, and  $k_{\min}, k_{\max}$  are the minimum and maximum indices in Fourier coordinates. In our paper, we define the low/middle/high-frequency regions as Low:  $k_{\min} = 0, k_{\max} = 4$ , Middle:  $k_{\min} = 5, k_{\max} = 12$ , and High:  $k_{\min} = 13, k_{\max} = \infty$ . This allows a quantitative discussion of the model performance’s dependence on the wavelength. In the multi-dimensional cases, we first integrate the angular coordinate direction of  $|\mathcal{F}[u_{\text{pred}} - u_{\text{true}}](k)|^2$ , and take the sum along the  $k$ -coordinate.

### B.1 Inverse Problem Metrics

For the inverse problem setup, we selected various metrics. The major difference with respect to the forward metrics is that we have two main quantities to measure:

<sup>10</sup> PDEBENCH repository <https://github.com/pdebench/PDEBench>

- the error of the *quantity* we want to estimate, in our case the initial condition  $u_0$ :

$$\mathcal{L}(u_0, \hat{u}_0)$$

where  $\hat{u}_0$  is the estimated value;

- the error of the *prediction* based on the estimated initial condition  $u(t, x|u_0)$ ,

$$\mathcal{L}(u(t, x|u_0), u(t, x|\hat{u}_0))$$

In general, we expect a larger error when we measure the error in the estimated quantity w.r.t. the predicted quantity. This is mainly due to the early decay of high frequencies of the PDE. We evaluated the error of the prediction at a specific instant in time  $t = T$ , that has been selected as  $T = 15$  for all the tested datasets, except  $T = 5$  for the CFD dataset.

The metrics that we used for the inverse problem are: 1) MSE 2) the normalized  $\ell_2$  norm (L2), 3) the normalized  $\ell_3$  norm (L3); 4) the FFT MSE, the FFT L2 and 5) the FFT L3. For the frequency metrics we investigated the low frequency (between 0 and 1/4 of the max frequency), the middle frequency (between 1/4 and 3/4) and high frequency (between 3/4 and the maximum frequency) ranges. In Fig. 12, the right figure shows the frequency power density, where we see that the largest error is found in the middle frequency range.

## C Training Protocol and Hyperparameters

The model was trained for 500 epochs with the Adam optimizer [24] as per the protocol of the original FNO. The initial learning rate was set as  $10^{-3}$  and reduced by half after each 100 epochs. The datasets are split into 90% training and 10% validation and testing. For the PINNs, we use DeepXDE [34] implementation. The training was performed for 15,000 epochs with the Adam optimizer, with the learning rate set to  $10^{-3}$ . As with the example problems from that library we use a fully-connected network of depth 6 with 40 neurons each. In contrast to the other surrogate models, the PINN baseline can be trained and tested only on a single sample, and is valid only for a specific initial and boundary condition. To get more reliable error bounds, we thus chose to train the PINN baseline for 10 different samples per dataset and average the resulting error metrics.

### C.1 Inverse problem

For testing the power of surrogate models to solve inverse problems, we consider a simplified scenario where the machine learning model directly predicts a specific time in the future  $t = T$ . When training to predict a specific time in the future, we reduce the training time and avoid to consider the effect of training approaches (as discussed in the temporal analysis section subsection 4.3) in evaluating the surrogate models. We trained over  $N_{\text{epoch}} = 20$  epochs and we selected as final time step  $T = 15$  for all tested datasets, except for the CFD dataset where we selected  $T = 5$ . We used similar parameters used in the forward training, while we selected 64 hidden values to be estimated for the initial condition and 100 samples to test and 0.2 as learning rate for the gradient method. The loss function for the gradient computation is the MSE.

## D Detailed Problem Description

In this section, we provide more detailed descriptions of each PDE and its applications. Note that PDE is the basic mathematical tool to describe the evolution of the system in physics. Interested readers are referred to representative textbooks of physics, for example, [12].

### D.1 1D Advection Equation

The advection equation models pure advection behavior without non-linearity whose expression is given as:

$$\partial_t u(t, x) + \beta \partial_x u(t, x) = 0, \quad x \in (0, 1), t \in (0, 2], \quad (6)$$

$$u(0, x) = u_0(x), \quad x \in (0, 1), \quad (7)$$

where  $\beta$  is a constant advection speed. Note that the exact solution of the system is given as:  $u(t, x) = u_0(x - \beta t)$ .

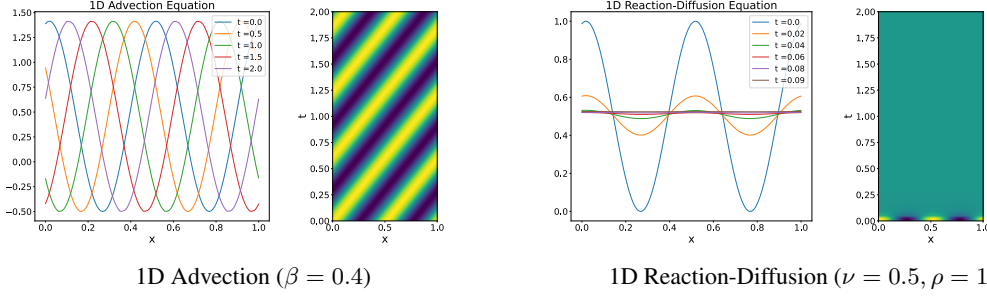

Figure 6: Visualization of the time evolution of 1D Advection equation and Reaction-Diffusion equation.

In our dataset, we only considered the periodic boundary condition. As an initial condition, we use a super-position of sinusoidal waves as:

$$u_0(x) = \sum_{k_i=k_1, \dots, k_N} A_i \sin(k_i x + \phi_i), \quad (8)$$

where  $k_i = 2\pi\{n_i\}/L_x$  are wave numbers whose  $\{n_i\}$  are integer numbers selected randomly in  $[1, n_{\max}]$ ,  $N$  is the integer determining how many waves to be added,  $L_x$  is the calculation domain size,  $A_i$  is a random float number uniformly chosen in  $[0, 1]$ , and  $\phi_i$  is the randomly chosen phase in  $(0, 2\pi)$ . In 1D-advection case, we set  $k_{\max} = 8$  and  $N = 2$ . After calculating Equation 8, we randomly operate the absolute value function with random signature and the window-function with 10% probability, respectively.

The numerical solution was calculated with the temporally and spatially 2nd-order upwind finite difference scheme.

## D.2 1D Diffusion-Reaction Equation

Here, we consider a one-dimensional diffusion-reaction type PDE, that combines a diffusion process and a rapid evolution from a source term [27]. The equation is expressed as:

$$\partial_t u(t, x) - \nu \partial_{xx} u(t, x) - \rho u(1 - u) = 0, \quad x \in (0, 1), t \in (0, 1], \quad (9)$$

$$u(0, x) = u_0(x), \quad x \in (0, 1). \quad (10)$$

Note that the variable  $u$  develops at potentially exponential rate because of the force term which depends on  $u$ . measure the ability to capture very rapid dynamics.

Similar to the 1D advection equation case, we use the periodic boundary condition and Equation 8 as the initial condition. To avoid an ill-defined initial condition, we also applied the absolute value function and a normalization operation, dividing the initial condition by the maximum value. The numerical solution was calculated with the temporally and spatially 2nd-order central difference scheme. For the source term part, we use the piecewise-exact solution (PES) method [20].

## D.3 Burgers equation

The Burgers' equation is a PDE modeling the non-linear behavior and diffusion process in fluid dynamics as

$$\partial_t u(t, x) + \partial_x(u^2(t, x)/2) = \nu/\pi \partial_{xx} u(t, x), \quad x \in (0, 1), t \in (0, 2], \quad (11)$$

$$u(0, x) = u_0(x), \quad x \in (0, 1), \quad (12)$$

where  $\nu$  is the diffusion coefficient, which is assumed constant in our dataset.

Note that setting  $R \equiv \pi u L / \nu$  describes the system's evolution as the Reynolds number of the Navier-Stokes equation (2);  $R > 1$  means the strong non-linear case support forming shock phenomena, and  $R < 1$  means the diffusive case.

Similar to the 1D advection equation case, we use the periodic boundary condition and Equation 8 as the initial condition. The numerical solution was calculated with the temporally and spatially

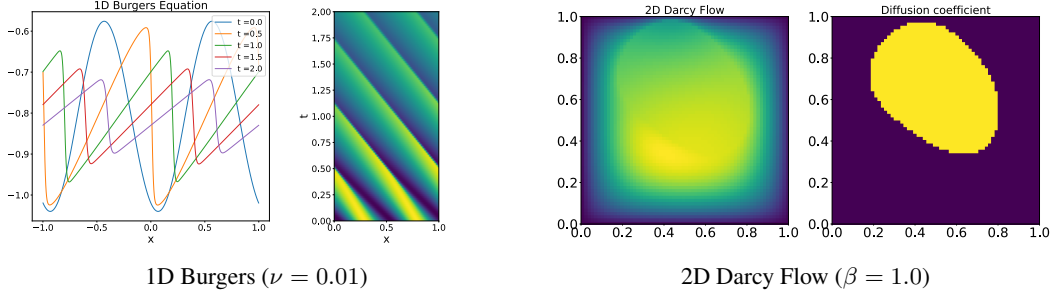

Figure 7: Visualization of the time evolution of 1D Burgers equation and 2D Darcy Flow.

2nd-order upwind difference scheme for the advection term, and the central difference scheme for the diffusion term.

#### D.4 Darcy Flow

We experiment with the steady-state solution of 2D Darcy Flow over the unit square, whose viscosity term  $a(x)$  is an input of the system. The solution of the steady-state is defined by the following equation

$$-\nabla(a(x)\nabla u(x)) = f(x), \quad x \in (0,1)^2, \quad (13)$$

$$u(x) = 0, \quad x \in \partial(0,1)^2. \quad (14)$$

In this paper, the force term  $f$  is set as a constant value  $\beta$ , changing the scale of the solution  $u(x)$ . Instead of directly solving [Equation 13](#), we obtained the solution by solving a temporal evolution equation:

$$\partial_t u(x,t) - \nabla(a(x)\nabla u(x,t)) = f(x), \quad x \in (0,1)^2, \quad (15)$$

with random field initial condition, until reaching a steady state. The numerical calculation was performed the same as the case of the 1D Diffusion-Reaction equation.

#### D.5 Compressible Navier-Stokes equation

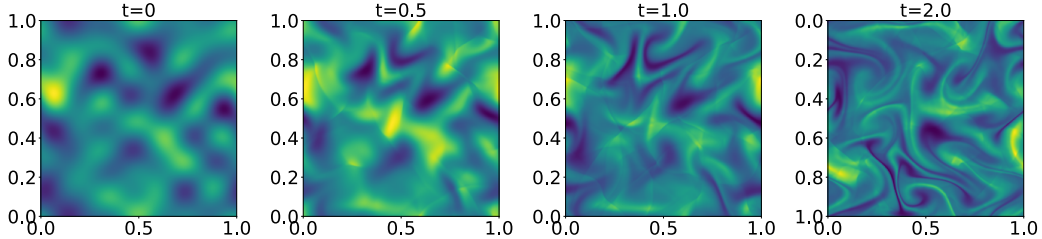

Figure 8: Visualization of the time evolution of the density in the case of 2D Compressible Navier-Stokes equations (inviscid,  $M = 0.1$ ).

The compressible fluid dynamic equations describe a fluid flow,

$$\partial_t \rho + \nabla \cdot (\rho \mathbf{v}) = 0, \quad (16a)$$

$$\rho(\partial_t \mathbf{v} + \mathbf{v} \cdot \nabla \mathbf{v}) = -\nabla p + \eta \Delta \mathbf{v} + (\zeta + \eta/3) \nabla(\nabla \cdot \mathbf{v}), \quad (16b)$$

$$\partial_t \left[ \epsilon + \frac{\rho v^2}{2} \right] + \nabla \cdot \left[ \left( \epsilon + p + \frac{\rho v^2}{2} \right) \mathbf{v} - \mathbf{v} \cdot \sigma' \right] = 0, \quad (16c)$$

where  $\rho$  is the mass density,  $\mathbf{v}$  is the velocity,  $p$  is the gas pressure,  $\epsilon = p/(\Gamma - 1)$  is the internal energy,  $\Gamma = 5/3$ ,  $\sigma'$  is the viscous stress tensor, and  $\eta, \zeta$  are the shear and bulk viscosity, respectively.

PDEBENCH provides the following training datasets for the compressible Navier-Stokes equations:

| $N_d$ | initial field | boundary condition | $(\eta, \zeta, M)$        |
|-------|---------------|--------------------|---------------------------|
| 1D    | random field  | periodic           | $(10^{-8}, 10^{-8}, -)$   |
| 1D    | random field  | periodic           | $(10^{-2}, 10^{-2}, -)$   |
| 1D    | random field  | periodic           | $(10^{-1}, 10^{-1}, -)$   |
| 1D    | random field  | out-going          | $(10^{-8}, 10^{-8}, -)$   |
| 1D    | shock-tube    | out-going          | $(10^{-8}, 10^{-8}, -)$   |
| 2D    | random field  | periodic           | $(10^{-8}, 10^{-8}, 0.1)$ |
| 2D    | random field  | periodic           | $(10^{-2}, 10^{-2}, 0.1)$ |
| 2D    | random field  | periodic           | $(10^{-1}, 10^{-1}, 0.1)$ |
| 2D    | random field  | periodic           | $(10^{-8}, 10^{-8}, 1.0)$ |
| 2D    | random field  | periodic           | $(10^{-2}, 10^{-2}, 1.0)$ |
| 2D    | random field  | periodic           | $(10^{-1}, 10^{-1}, 1.0)$ |
| 2D    | turbulence    | periodic           | $(10^{-8}, 10^{-8}, 0.1)$ |
| 2D    | turbulence    | periodic           | $(10^{-8}, 10^{-8}, 1.0)$ |
| 3D    | random field  | periodic           | $(10^{-8}, 10^{-8}, 1.0)$ |
| 3D    | random field  | periodic           | $(10^{-2}, 10^{-2}, 1.0)$ |

where  $N_d$  is the number of spatial dimensions,  $M = |v|/c_s$  is the Mach number,  $c_s = \sqrt{\Gamma p/\rho}$  is the sound velocity. The outgoing boundary condition is copying the neighbor cell to the boundary region which allows waves and fluid to escape from the computational domain, and is popular for astrophysics simulations [52]. The random field initial condition is applying Equation 8 which is extended to higher dimensions for the 2D and 3D cases. Note that density and pressure are prepared by adding a uniform background to the perturbation field Equation 8. The turbulence initial condition considers turbulent velocity with uniform mass density and pressure. The velocity is calculated similarly to Equation 8 as

$$\mathbf{v}(x, t = 0) = \sum_{i=1}^n \mathbf{A}_i \sin(k_i x + \phi_i), \quad (17)$$

where  $n = 4$  and  $A_i = \bar{v}/|k|^d$ , and  $d = 1, 2$  when considering 2D and 3D, respectively.  $\bar{v}$  is determined by the initial Mach number as  $\bar{v} = c_s M$ . To reduce the compressibility effect, we subtracted the compressible field from Equation 17 by the Helmholtz-decomposition in the Fourier space.

The shock-tube initial field is composed as  $Q(x, t = 0) = (Q_L, Q_R)$ , where  $Q = (\rho, \mathbf{v}, p)$  and  $Q_L, Q_R$  are randomly determined constant values. The location of the initial discontinuity is also randomly determined. This problem is called the "Riemann problem", and the initial discontinuity generates shocks and rarefaction depending on the values of  $Q_L, Q_R$ , which are very difficult to obtain without solving the PDEs. This scenario can be used for a rigorous test if ML models fully understand Equation 16a- Equation 16c. The numerical solution was calculated with the temporally and spatially 2nd-order HLLC scheme [57] with the MUSCL method [59] for the inviscid part, and the central difference scheme for the viscous part.

## D.6 Inhomogenous, incompressible Navier-Stokes

A popular simplification of the Navier-Stokes equation is the incompressible version, commonly used to model dynamics supposed to be far lower than the speed of propagation of waves in the medium,

$$\nabla \cdot \mathbf{v} = 0, \quad \rho(\partial_t \mathbf{v} + \mathbf{v} \cdot \nabla \mathbf{v}) = -\nabla p + \eta \Delta \mathbf{v}. \quad (18)$$

These simplify the compressible Navier-Stokes equations Eq. (2), by substituting the first term in Eq. (18) instead of the first term in (16), from which we can eliminate several elements in the second terms of Eq. (18). Additionally, we have introduced the assumption that the fluid is homogeneous (i.e. not a fluid comprising two or more substances of different density or viscosity).

We employ an augmented form of (18) which includes a vector field *forcing* term  $\mathbf{u}$ ,

$$\rho(\partial_t \mathbf{v} + \mathbf{v} \cdot \nabla \mathbf{v}) = -\nabla p + \eta \Delta \mathbf{v} + \mathbf{u}. \quad (19)$$

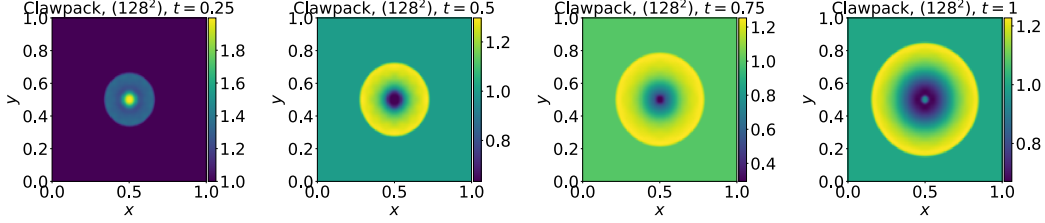

Figure 9: Visualization of the time evolution of the 2D shallow-water equations data.

Non-periodic conditions are included to challenge models which perform well upon periodic domains, such as the FNO [32]. The forcing term poses challenges based upon spatially heterogeneous dynamics. Firstly, this allows us to see if the prediction methods can successfully learn to predict in the presence of heterogeneity. Secondly, this permits us to use the spatially varying random field as a target for inverse inference.

Initial conditions  $\mathbf{v}_0$  and inhomogeneous forcing parameters  $\mathbf{u}$  are each drawn from isotropic Gaussian random fields with truncated power-law decay  $\tau$  of the power spectral density and scale  $\sigma$ , where  $\tau_{\mathbf{v}_0} = -3$ ,  $\sigma_{\mathbf{v}_0} = 0.15$ ,  $\tau_{\mathbf{u}} = -1$ ,  $\sigma_{\mathbf{u}} = 0.4$ . The variation in the resulting field is due to the alteration in the random seed. We set the domain to the unit square  $\Omega = [0, 1]^2$ , the viscosity to  $\nu = 0.01$ . Simulations are implemented using Phiflow [18]. Boundary conditions are Dirichlet, clamping field velocity to null at the perimeter.

## D.7 2D Shallow-Water Equations

The shallow-water equations, derived from the general Navier-Stokes equations, present a suitable framework for modelling free-surface flow problems. In 2D, these come in the form of the following system of hyperbolic PDEs,

$$\partial_t h + \partial_x hu + \partial_y hv = 0, \quad (20a)$$

$$\partial_t hu + \partial_x \left( u^2 h + \frac{1}{2} g_r h^2 \right) = -g_r h \partial_x b, \quad (20b)$$

$$\partial_t hv + \partial_y \left( v^2 h + \frac{1}{2} g_r h^2 \right) = -g_r h \partial_y b, \quad (20c)$$

with  $u, v$  being the velocities in horizontal and vertical direction,  $h$  describing the water depth and  $b$  describing a spatially varying bathymetry.  $hu, hv$  can be interpreted as the directional momentum components and  $g_r$  describes the gravitational acceleration.

The specific simulation we include in our benchmark for the shallow-water equations problem as introduced in [D.7] is a 2D radial dam break scenario. On a square domain  $\Omega = [-2.5, 2.5]^2$  we initialize the water height as a circular bump in the center of the domain

$$h(t = 0, x, y) = \begin{cases} 2.0, & \text{for } r < \sqrt{x^2 + y^2} \\ 1.0, & \text{for } r \geq \sqrt{x^2 + y^2} \end{cases} \quad (21)$$

with the radius  $r$  randomly sampled from  $\mathcal{U}(0.3, 0.7)$ . For generating the datasets we simulate this problem using the PyClaw [23] Python package which offers a comprehensive finite volume solver. A time evolution visualization of the equation is shown in [Figure 9].

## D.8 Diffusion-Sorption Equation

The diffusion-sorption equation models a diffusion process which is retarded by a sorption process. The equation is written as

$$\partial_t u(t, x) = D/R(u) \partial_{xx} u(t, x), \quad x \in (0, 1), t \in (0, 500]. \quad (22)$$

where  $D$  is the effective diffusion coefficient,  $R$  is the retardation factor representing the sorption that hinders the diffusion process. Note that  $R$  is dependent on the variable  $u$ . This equation is applicable to real world scenarios, one of the most prominent being groundwater contaminant transport.

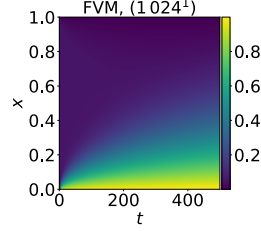

Figure 10: Visualization of the time evolution of the 1D diffusion-sorption equations data.

This equation is retarded by the retardation factor  $R$  which is dependent on  $u$  based on the Freundlich sorption isotherm [33]:

$$R(u) = 1 + \frac{1 - \phi}{\phi} \rho_s k n_f u^{n_f - 1}, \quad (23)$$

where  $\phi = 0.29$  is the porosity of the porous medium,  $\rho_s = 2880$  is the bulk density,  $k = 3.5 \times 10^{-4}$  is the Freundlich's parameter,  $n_f = 0.874$  is the Freundlich's exponent, and the effective diffusion coefficient  $D = 5 \times 10^{-4}$ . The initial condition is generated with a uniform distribution  $u(0, x) \sim U(0, 0.2)$  for  $x \in (0, 1)$ . We provide datasets discretized into  $N_x = 1024$  and  $N_t = 501$ , as well as the temporally downsampled version for the models training with  $N_t = 101$ . The spatial discretization is performed using the finite volume method [39] and the time integration using the built-in fourth order Runge-Kutta method in the *scipy* package [60].

This particular example is interesting because of a few things. First, the diffusion coefficient becomes non-linear with dependency on  $u$ . And based on Equation 23, it is clear that there is a singularity when  $u = 0$ . Second, it is highly applicable to a real-world problem, namely the groundwater contaminant transport [41]. To date, application of machine learning to real-world physics problems is still rare. Third, we employ boundary conditions that are not the usual zero or periodic conditions that can be easily padded in models with a convolutional structure. Here, we use  $u(t, 0) = 1.0$  and  $u(t, 1) = D \partial_x u(t, 1)$ . The second boundary condition is particularly challenging since it uses a derivative instead of a constant value. For generating the datasets we simulate this problem using a standard finite volume solver. A time evolution visualization of the equation is shown in Figure 10.

## D.9 2D Diffusion-Reaction Equation

In addition to the 1D diffusion-reaction equation, which involves only a single variable, we also consider extending the application to a 2D domain, with two non-linearly coupled variables, namely the activator  $u = u(t, x, y)$  and the inhibitor  $v = v(t, x, y)$ . The equation is written as

$$\partial_t u = D_u \partial_{xx} u + D_u \partial_{yy} u + R_u, \quad \partial_t v = D_v \partial_{xx} v + D_v \partial_{yy} v + R_v, \quad (24)$$

where  $D_u$  and  $D_v$  are the diffusion coefficient for the activator and inhibitor, respectively,  $R_u = R_u(u, v)$  and  $R_v = R_v(u, v)$  are the activator and inhibitor reaction function, respectively. The domain of the simulation includes  $x \in (-1, 1)$ ,  $y \in (-1, 1)$ ,  $t \in (0, 5]$ . This equation is applicable most prominently for modeling biological pattern formation.

The reaction functions for the activator and inhibitor are defined by the Fitzhugh-Nagumo equation [25], written as:

$$R_u(u, v) = u - u^3 - k - v, \quad (25)$$

$$R_v(u, v) = u - v, \quad (26)$$

where  $k = 5 \times 10^{-3}$ , and the diffusion coefficients for the activator and inhibitor are  $D_u = 1 \times 10^{-3}$  and  $D_v = 5 \times 10^{-3}$ , respectively. The initial condition is generated as standard normal random noise  $u(0, x, y) \sim \mathcal{N}(0, 1.0)$  for  $x \in (-1, 1)$  and  $y \in (-1, 1)$ . We provide datasets discretized into  $N_x = 512$ ,  $N_y = 512$  and  $N_t = 501$ , as well as the downsampled version for the models training with  $N_x = 128$ ,  $N_y = 128$ , and  $N_t = 101$ . As in the 1D diffusion-sorption equation, the spatial discretization is performed using the finite volume method [39], and the time integration is performed using the built-in fourth order Runge-Kutta method in the *scipy* package [60].

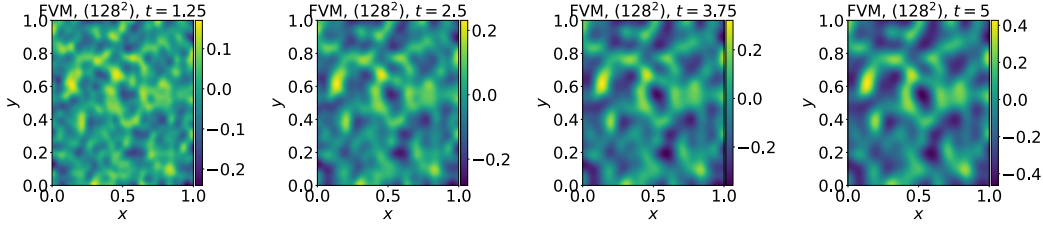

Figure 11: Visualization of the time evolution of the 2D diffusion-reaction equations data.

We included the 2D diffusion-reaction equation as an example because it serves as a challenging benchmark problem. First, there are two variables of interest, namely the activator and inhibitor, which are non-linearly coupled. Second, it also has applicability in real-world problems, namely biological pattern formation [58]. Third, we also employ a no-flow Neumann boundary condition, meaning that  $D_u \partial_x u = 0$ ,  $D_v \partial_x v = 0$ ,  $D_u \partial_y u = 0$ , and  $D_v \partial_y v = 0$  for  $x, y \in (-1, 1)^2$ . For generating the datasets we simulate this problem using a standard finite volume solver. A time evolution visualization of the equation is shown in Figure 11.

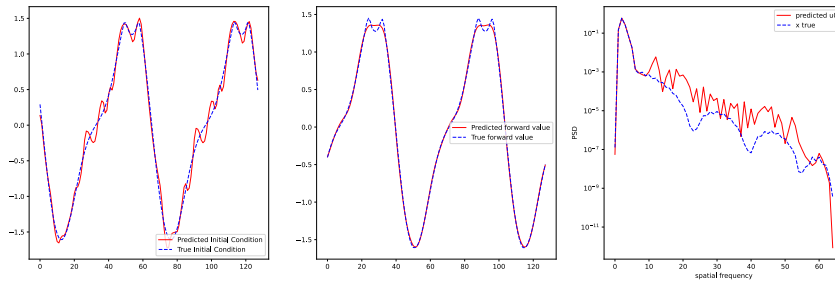

Figure 12: Inverse problem for the 1d advection equation with  $\beta = 0.1$ . The spectra density where most of the error is concentrated in the higher frequencies is depicted on the right.

## D.10 Gradient-Based Inverse Method

The inverse problem aims at solving an inverse inference by minimising the prediction loss [7, 40],

$$\mathcal{L}(u(t = T, x|u_0), u(t = T, x|\hat{u}_0))$$

where  $\hat{u}_0 \sim p_\theta(u_0|u(t = T, x))$ .

The generation process  $p_\theta(u_0|u(t = T, x))$  is a deterministic function, whose parameters  $\theta$  use a bilinear interpolation to recover the initial condition [35].

Figure 12 shows the solution of the inverse problem for the 1d advection equation. On the left, we see the true and estimated initial condition, and on the right the power density in the frequency domain. As we can see, the error is concentrated in the mid-high frequencies. In the middle we have the true and predicted value at time  $t = T$ . The error is smaller than in the plot on the left.

Table 2, Table 3 and Table 4 show the error in the spatial and frequency domain of 4 datasets and using FNO and U-Net as surrogate models. In Fig 12, the left figure visualizes the true and the estimated initial condition, while the middle figure is the predicted and the true value. As shown in the figure on the right, the largest error is in the higher frequencies. This effect is also visible from the frequency metrics of Tab 3 and Tab 4. In the experiment we use the same initial and boundary conditions of the forward problem.



| PDE               | Metric | Forward model                               |                                             |
|-------------------|--------|---------------------------------------------|---------------------------------------------|
|                   |        | FNO                                         | U-Net                                       |
| Advection_beta4   | MSE    | $2.4 \times 10^{-3} \pm 3.4 \times 10^{-3}$ | $1.0 \times 10^{+0} \pm 5.6 \times 10^{-2}$ |
|                   | nL2    | $3.9 \times 10^{-2} \pm 2.9 \times 10^{-2}$ | $1.0 \times 10^{+0} \pm 2.8 \times 10^{-2}$ |
|                   | nL3    | $4.4 \times 10^{-2} \pm 3.3 \times 10^{-2}$ | $1.0 \times 10^{+0} \pm 2.9 \times 10^{-2}$ |
|                   | MSE'   | $2.9 \times 10^{-4} \pm 5.8 \times 10^{-4}$ | $9.9 \times 10^{-1} \pm 2.5 \times 10^{-2}$ |
|                   | nL2'   | $1.4 \times 10^{-2} \pm 1.1 \times 10^{-2}$ | $1.0 \times 10^{+0} \pm 8.0 \times 10^{-3}$ |
|                   | nL3'   | $1.6 \times 10^{-2} \pm 1.3 \times 10^{-2}$ | $1.0 \times 10^{+0} \pm 8.4 \times 10^{-3}$ |
| Burgers_Nu1       | MSE    | $1.0 \times 10^{+0} \pm 2.2 \times 10^{-1}$ | $1.3 \times 10^{+0} \pm 2.3 \times 10^{-1}$ |
|                   | nL2    | $1.0 \times 10^{+0} \pm 1.0 \times 10^{-1}$ | $1.1 \times 10^{+0} \pm 1.0 \times 10^{-1}$ |
|                   | nL3    | $1.0 \times 10^{+0} \pm 1.0 \times 10^{-1}$ | $1.1 \times 10^{+0} \pm 1.1 \times 10^{-1}$ |
|                   | MSE'   | $1.3 \times 10^{-4} \pm 2.8 \times 10^{-4}$ | $2.5 \times 10^{-3} \pm 1.9 \times 10^{-3}$ |
|                   | nL2'   | $7.0 \times 10^{-1} \pm 4.6 \times 10^{-1}$ | $1.6 \times 10^{+1} \pm 2.0 \times 10^{+1}$ |
|                   | nL3'   | $7.0 \times 10^{-1} \pm 4.4 \times 10^{-1}$ | $1.7 \times 10^{+1} \pm 2.1 \times 10^{+1}$ |
| CFD_Shock_Trans   | MSE    | $3.4 \times 10^{+0} \pm 5.3 \times 10^{-1}$ | $1.1 \times 10^{+2} \pm 2.0 \times 10^{+1}$ |
|                   | nL2    | $1.8 \times 10^{+0} \pm 1.4 \times 10^{-1}$ | $1.0 \times 10^{+1} \pm 1.1 \times 10^{+0}$ |
|                   | nL3    | $1.9 \times 10^{+0} \pm 2.7 \times 10^{-1}$ | $1.1 \times 10^{+1} \pm 1.6 \times 10^{+0}$ |
|                   | MSE'   | $1.0 \times 10^{-1} \pm 5.9 \times 10^{-2}$ | $4.2 \times 10^{-1} \pm 9.2 \times 10^{-1}$ |
|                   | nL2'   | $3.3 \times 10^{-1} \pm 8.5 \times 10^{-2}$ | $5.8 \times 10^{-1} \pm 3.9 \times 10^{-1}$ |
|                   | nL3'   | $3.6 \times 10^{-1} \pm 9.6 \times 10^{-2}$ | $6.0 \times 10^{-1} \pm 4.0 \times 10^{-1}$ |
| ReacDiff_Nu1_Rho2 | MSE    | $1.7 \times 10^{+0} \pm 2.1 \times 10^{-1}$ | $2.0 \times 10^{+0} \pm 3.8 \times 10^{-1}$ |
|                   | nL2    | $1.3 \times 10^{+0} \pm 8.4 \times 10^{-2}$ | $1.4 \times 10^{+0} \pm 1.3 \times 10^{-1}$ |
|                   | nL3    | $1.3 \times 10^{+0} \pm 8.1 \times 10^{-2}$ | $1.5 \times 10^{+0} \pm 1.3 \times 10^{-1}$ |
|                   | MSE'   | $5.4 \times 10^{-2} \pm 1.2 \times 10^{-1}$ | $6.4 \times 10^{-1} \pm 3.5 \times 10^{-1}$ |
|                   | nL2'   | $1.2 \times 10^{-1} \pm 1.2 \times 10^{-1}$ | $7.3 \times 10^{-1} \pm 5.1 \times 10^{-2}$ |
|                   | nL3'   | $1.2 \times 10^{-1} \pm 1.2 \times 10^{-1}$ | $7.3 \times 10^{-1} \pm 5.0 \times 10^{-2}$ |

Table 2: Error of the inverse problem. The prime indicates the error of the prediction, for example MSE' is the MSE at time  $t = T$ . The MSE for example in the first row is one order of magnitude lower. nL2 and nL3 are the normalized L2 and L3 norm error,  $nLp = \|\hat{\mathbf{y}} - \mathbf{y}\|_p / \|\mathbf{y}\|_p, p = 2, 3$ .

| PDE               | Metric     | Forward model         |                       |
|-------------------|------------|-----------------------|-----------------------|
|                   |            | FNO                   | U-Net                 |
| Advection_beta4   | fMSE       | $3.04 \times 10^{-1}$ | $1.29 \times 10^{+2}$ |
|                   | fMSE low   | $5.56 \times 10^{-1}$ | $1.29 \times 10^{+2}$ |
|                   | fMSE mid   | $5.26 \times 10^{-2}$ | $1.29 \times 10^{+2}$ |
|                   | fMSE high  | $3.03 \times 10^{-1}$ | $1.29 \times 10^{+2}$ |
|                   | fMSE'      | $3.67 \times 10^{-2}$ | $9.92 \times 10^{-1}$ |
|                   | fMSE' low  | $1.60 \times 10^{-2}$ | $9.92 \times 10^{-1}$ |
|                   | fMSE' mid  | $5.74 \times 10^{-2}$ | $9.92 \times 10^{-1}$ |
|                   | fMSE' high | $3.68 \times 10^{-2}$ | $9.92 \times 10^{-1}$ |
|                   | fL2        | $3.91 \times 10^{-2}$ | $1.00 \times 10^{+0}$ |
|                   | fL2 low    | $3.75 \times 10^{-2}$ | $1.01 \times 10^{+0}$ |
|                   | fL2 mid    | $1.41 \times 10^{+1}$ | $0.00 \times 10^{+0}$ |
|                   | fL2 high   | $3.90 \times 10^{-2}$ | $0.00 \times 10^{+0}$ |
| Burgers_Nu1       | fMSE       | $1.29 \times 10^{+2}$ | $1.59 \times 10^{+2}$ |
|                   | fMSE low   | $2.58 \times 10^{+2}$ | $1.59 \times 10^{+2}$ |
|                   | fMSE mid   | $1.19 \times 10^{-1}$ | $1.59 \times 10^{+2}$ |
|                   | fMSE high  | $1.29 \times 10^{+2}$ | $1.59 \times 10^{+2}$ |
|                   | fMSE'      | $1.67 \times 10^{-2}$ | $2.46 \times 10^{-3}$ |
|                   | fMSE' low  | $3.36 \times 10^{-2}$ | $2.46 \times 10^{-3}$ |
|                   | fMSE' mid  | $9.26 \times 10^{-7}$ | $2.46 \times 10^{-3}$ |
|                   | fMSE' high | $1.66 \times 10^{-2}$ | $2.46 \times 10^{-3}$ |
|                   | fL2        | $9.98 \times 10^{-1}$ | $1.11 \times 10^{+0}$ |
|                   | fL2 low    | $9.98 \times 10^{-1}$ | $1.11 \times 10^{+0}$ |
|                   | fL2 mid    | $3.50 \times 10^{+0}$ | $0.00 \times 10^{+0}$ |
|                   | fL2 high   | $9.98 \times 10^{-1}$ | $0.00 \times 10^{+0}$ |
| CFD_Shock_Trans   | fMSE       | $4.37 \times 10^{+2}$ | $1.40 \times 10^{+4}$ |
|                   | fMSE low   | $4.37 \times 10^{+2}$ | $1.40 \times 10^{+4}$ |
|                   | fMSE mid   | $4.37 \times 10^{+2}$ | $1.40 \times 10^{+4}$ |
|                   | fMSE high  | $4.37 \times 10^{+2}$ | $1.40 \times 10^{+4}$ |
|                   | fMSE'      | $1.28 \times 10^{+1}$ | $2.19 \times 10^{+2}$ |
|                   | fMSE' low  | $3.21 \times 10^{+1}$ | $2.19 \times 10^{+2}$ |
|                   | fMSE' mid  | $1.13 \times 10^{+0}$ | $2.19 \times 10^{+2}$ |
|                   | fMSE' high | $8.98 \times 10^{+0}$ | $2.19 \times 10^{+2}$ |
|                   | fL2        | $1.84 \times 10^{+0}$ | $1.04 \times 10^{+1}$ |
|                   | fL2 low    | $1.51 \times 10^{+0}$ | $9.95 \times 10^{+0}$ |
|                   | fL2 mid    | $0.00 \times 10^{+0}$ | $0.00 \times 10^{+0}$ |
|                   | fL2 high   | $0.00 \times 10^{+0}$ | $0.00 \times 10^{+0}$ |
| ReacDiff_Nu1_Rho2 | fMSE       | $2.17 \times 10^{+2}$ | $2.55 \times 10^{+2}$ |
|                   | fMSE low   | $6.10 \times 10^{+2}$ | $2.55 \times 10^{+2}$ |
|                   | fMSE mid   | $1.48 \times 10^{-2}$ | $2.55 \times 10^{+2}$ |
|                   | fMSE high  | $1.28 \times 10^{+2}$ | $2.55 \times 10^{+2}$ |
|                   | fMSE'      | $6.94 \times 10^{+0}$ | $6.35 \times 10^{-1}$ |
|                   | fMSE' low  | $2.77 \times 10^{+1}$ | $6.35 \times 10^{-1}$ |
|                   | fMSE' mid  | $1.14 \times 10^{-5}$ | $6.35 \times 10^{-1}$ |
|                   | fMSE' high | $1.29 \times 10^{-4}$ | $6.35 \times 10^{-1}$ |
|                   | fL2        | $1.30 \times 10^{+0}$ | $1.41 \times 10^{+0}$ |
|                   | fL2 low    | $1.54 \times 10^{+0}$ | $1.60 \times 10^{+0}$ |
|                   | fL2 mid    | $7.45 \times 10^{+0}$ | $0.00 \times 10^{+0}$ |
|                   | fL2 high   | $1.00 \times 10^{+0}$ | $0.00 \times 10^{+0}$ |

Table 3: Frequency error of the inverse problem. fMSE, fL2 and fL3 are the frequency version of the MSE, normalized L2 and L3 norm metrics. Low, mid and high is the range of frequencies. Prime is used for the error in the prediction, without the error of the initial condition estimation. Normalised metric are not well defined, when the original signal is zero.

| PDE               | Metric    | Forward model          |                        |
|-------------------|-----------|------------------------|------------------------|
|                   |           | FNO                    | U-Net                  |
| Advection_beta4   | fL2'      | $1.36 \times 10^{-2}$  | $1.13 \times 10^{+1}$  |
|                   | fL2' low  | $7.50 \times 10^{-3}$  | $5.66 \times 10^{+0}$  |
|                   | fL2' mid  | $1.61 \times 10^{+0}$  | $5.27 \times 10^{+1}$  |
|                   | fL2' high | $1.36 \times 10^{-2}$  | $8.01 \times 10^{+0}$  |
|                   | fL3       | $3.14 \times 10^{-2}$  | $1.00 \times 10^{+0}$  |
|                   | fL3 low   | $3.12 \times 10^{-2}$  | $1.00 \times 10^{+0}$  |
|                   | fL3 mid   | $1.75 \times 10^{+1}$  | $0.00 \times 10^{+0}$  |
|                   | fL3 high  | $3.14 \times 10^{-2}$  | $0.00 \times 10^{+0}$  |
|                   | fL3'      | $9.51 \times 10^{-3}$  | $5.04 \times 10^{+0}$  |
|                   | fL3' low  | $5.62 \times 10^{-3}$  | $3.18 \times 10^{+0}$  |
|                   | fL3' mid  | $1.47 \times 10^{+0}$  | $2.77 \times 10^{+1}$  |
|                   | fL3' high | $9.51 \times 10^{-3}$  | $4.00 \times 10^{+0}$  |
| Burgers_Nu1       | fL2'      | $7.00 \times 10^{-1}$  | $1.82 \times 10^{+2}$  |
|                   | fL2' low  | $7.99 \times 10^{-1}$  | $6.28 \times 10^{+1}$  |
|                   | fL2' mid  | $1.03 \times 10^{+2}$  | $5.84 \times 10^{+5}$  |
|                   | fL2' high | $5.39 \times 10^{-1}$  | $1.31 \times 10^{+2}$  |
|                   | fL3       | $9.97 \times 10^{-1}$  | $1.04 \times 10^{+0}$  |
|                   | fL3 low   | $9.97 \times 10^{-1}$  | $1.04 \times 10^{+0}$  |
|                   | fL3 mid   | $3.58 \times 10^{+0}$  | $0.00 \times 10^{+0}$  |
|                   | fL3 high  | $9.97 \times 10^{-1}$  | $0.00 \times 10^{+0}$  |
|                   | fL3'      | $7.21 \times 10^{-1}$  | $4.88 \times 10^{+1}$  |
|                   | fL3' low  | $7.99 \times 10^{-1}$  | $2.40 \times 10^{+1}$  |
|                   | fL3' mid  | $9.35 \times 10^{+1}$  | $2.98 \times 10^{+5}$  |
|                   | fL3' high | $5.39 \times 10^{-1}$  | $3.92 \times 10^{+1}$  |
| CFD_Shock_Trans   | fL2'      | $3.34 \times 10^{-1}$  | $2.12 \times 10^{+0}$  |
|                   | fL2' low  | $2.68 \times 10^{-1}$  | $2.14 \times 10^{+0}$  |
|                   | fL2' mid  | $0.00 \times 10^{+0}$  | $0.00 \times 10^{+0}$  |
|                   | fL2' high | $0.00 \times 10^{+0}$  | $0.00 \times 10^{+0}$  |
|                   | fL3       | $1.26 \times 10^{+0}$  | $9.41 \times 10^{+0}$  |
|                   | fL3 low   | $1.11 \times 10^{+0}$  | $9.36 \times 10^{+0}$  |
|                   | fL3 mid   | $0.00 \times 10^{+0}$  | $0.00 \times 10^{+0}$  |
|                   | fL3 high  | $0.00 \times 10^{+0}$  | $0.00 \times 10^{+0}$  |
|                   | fL3'      | $2.16 \times 10^{-1}$  | $2.19 \times 10^{+0}$  |
|                   | fL3' low  | $1.96 \times 10^{-1}$  | $2.20 \times 10^{+0}$  |
|                   | fL3' mid  | $0.00 \times 10^{+0}$  | $0.00 \times 10^{+0}$  |
|                   | fL3' high | $0.00 \times 10^{+0}$  | $0.00 \times 10^{+0}$  |
| ReacDiff_Nu1_Rho2 | fL2'      | $1.23 \times 10^{-1}$  | $1.18 \times 10^{+1}$  |
|                   | fL2' low  | $1.23 \times 10^{-1}$  | $5.83 \times 10^{+0}$  |
|                   | fL2' mid  | $1.89 \times 10^{+18}$ | $1.90 \times 10^{+21}$ |
|                   | fL2' high | $9.03 \times 10^{+18}$ | $3.93 \times 10^{+21}$ |
|                   | fL3       | $1.27 \times 10^{+0}$  | $1.29 \times 10^{+0}$  |
|                   | fL3 low   | $1.45 \times 10^{+0}$  | $1.47 \times 10^{+0}$  |
|                   | fL3 mid   | $7.07 \times 10^{+0}$  | $0.00 \times 10^{+0}$  |
|                   | fL3 high  | $1.00 \times 10^{+0}$  | $0.00 \times 10^{+0}$  |
|                   | fL3'      | $1.23 \times 10^{-1}$  | $5.08 \times 10^{+0}$  |
|                   | fL3' low  | $1.23 \times 10^{-1}$  | $3.18 \times 10^{+0}$  |
|                   | fL3' mid  | $1.07 \times 10^{+18}$ | $7.25 \times 10^{+20}$ |
|                   | fL3' high | $6.54 \times 10^{+18}$ | $1.14 \times 10^{+21}$ |

Table 4: Frequency error of the prediction of the inverse problem. fMSE, fL2 and fL3 are the frequency version of the MSE, normalized L2 and L3 norm metrics. Low, mid and high is the range of the frequencies. Prime is used for the error in the prediction, without the error of the initial condition estimation. Normalised metric are not well defined, when the original signal is zero.

## E Detailed Baseline Score

Table 5: Summary of the baseline models’ performance for different evaluation metrics: RMSE, normalised RMSE (nRMSE), RMSE from conserved value (cRMSE), maximum error, RMSE at the boundaries (bRMSE), RMSE in Fourier space at low (fRMSE low), medium (fRMSE mid), and high frequency (fRMSE high) ranges applied to the diffusion-sorption, 2D diffusion-reaction, and shallow-water equations.

| PDE                    | Parameter | Metric     | Baseline model       |                      |                      |
|------------------------|-----------|------------|----------------------|----------------------|----------------------|
|                        |           |            | U-Net                | FNO                  | PINN                 |
| Diffusion-sorption     | N/A       | RMSE       | $5.8 \times 10^{-2}$ | $5.9 \times 10^{-4}$ | $9.9 \times 10^{-2}$ |
|                        |           | nRMSE      | $1.5 \times 10^{-1}$ | $1.7 \times 10^{-3}$ | $2.2 \times 10^{-1}$ |
|                        |           | max error  | $2.9 \times 10^{-1}$ | $7.8 \times 10^{-3}$ | $2.2 \times 10^{-1}$ |
|                        |           | cRMSE      | $4.8 \times 10^{-2}$ | $1.9 \times 10^{-4}$ | $7.5 \times 10^{-2}$ |
|                        |           | bRMSE      | $6.1 \times 10^{-3}$ | $2.0 \times 10^{-3}$ | $1.4 \times 10^{-1}$ |
|                        |           | fRMSE low  | $1.9 \times 10^{-2}$ | $1.5 \times 10^{-4}$ | $3.5 \times 10^{-2}$ |
|                        |           | fRMSE mid  | $4.7 \times 10^{-3}$ | $5.0 \times 10^{-5}$ | $5.2 \times 10^{-3}$ |
|                        |           | fRMSE high | $1.9 \times 10^{-4}$ | $7.1 \times 10^{-6}$ | $2.7 \times 10^{-4}$ |
| 2D diffusion-reaction  | N/A       | RMSE       | $6.1 \times 10^{-2}$ | $8.1 \times 10^{-3}$ | $1.9 \times 10^{-1}$ |
|                        |           | nRMSE      | $8.4 \times 10^{-1}$ | $1.2 \times 10^{-1}$ | $1.6 \times 10^{+0}$ |
|                        |           | max error  | $1.9 \times 10^{-1}$ | $9.1 \times 10^{-2}$ | $5.0 \times 10^{-1}$ |
|                        |           | cRMSE      | $3.9 \times 10^{-2}$ | $1.7 \times 10^{-3}$ | $1.3 \times 10^{-1}$ |
|                        |           | bRMSE      | $7.8 \times 10^{-2}$ | $2.7 \times 10^{-2}$ | $2.2 \times 10^{-1}$ |
|                        |           | fRMSE low  | $1.7 \times 10^{-2}$ | $8.2 \times 10^{-4}$ | $5.7 \times 10^{-2}$ |
|                        |           | fRMSE mid  | $5.4 \times 10^{-3}$ | $7.7 \times 10^{-4}$ | $1.3 \times 10^{-2}$ |
|                        |           | fRMSE high | $6.8 \times 10^{-4}$ | $4.1 \times 10^{-4}$ | $1.5 \times 10^{-3}$ |
| Shallow-water equation | N/A       | RMSE       | $8.6 \times 10^{-2}$ | $4.5 \times 10^{-3}$ | $1.7 \times 10^{-2}$ |
|                        |           | nRMSE      | $8.3 \times 10^{-2}$ | $4.4 \times 10^{-3}$ | $1.7 \times 10^{-2}$ |
|                        |           | max error  | $4.4 \times 10^{-1}$ | $4.5 \times 10^{-2}$ | $1.3 \times 10^{-3}$ |
|                        |           | cRMSE      | $1.3 \times 10^{-2}$ | $2.0 \times 10^{-4}$ | $1.7 \times 10^{-2}$ |
|                        |           | bRMSE      | $4.2 \times 10^{-3}$ | $1.4 \times 10^{-3}$ | $1.5 \times 10^{-1}$ |
|                        |           | fRMSE low  | $2.0 \times 10^{-2}$ | $2.6 \times 10^{-4}$ | $5.9 \times 10^{-3}$ |
|                        |           | fRMSE mid  | $7.0 \times 10^{-3}$ | $3.1 \times 10^{-4}$ | $1.9 \times 10^{-3}$ |
|                        |           | fRMSE high | $8.6 \times 10^{-4}$ | $2.5 \times 10^{-4}$ | $6.0 \times 10^{-4}$ |

Table 6: Summary of the baseline models' performance for different evaluation metrics: RMSE, normalised RMSE (nRMSE), RMSE from conserved value (cRMSE), maximum error, RMSE at the boundaries (bRMSE), RMSE in Fourier space at low (fRMSE low), medium (fRMSE mid), and high frequency (fRMSE high) ranges applied to the advection equation with different parameter values.

| PDE           | Parameter     | Metric               | Baseline model       |                      |                      |
|---------------|---------------|----------------------|----------------------|----------------------|----------------------|
|               |               |                      | U-Net                | FNO                  | PINN                 |
| Advection     | $\beta = 0.1$ | RMSE                 | $3.8 \times 10^{-2}$ | $4.9 \times 10^{-3}$ | $7.8 \times 10^{-1}$ |
|               |               | nRMSE                | $6.0 \times 10^{-2}$ | $9.3 \times 10^{-3}$ | $9.1 \times 10^{-1}$ |
|               |               | max error            | $4.9 \times 10^{-1}$ | $1.4 \times 10^{-1}$ | $1.5 \times 10^{+0}$ |
|               |               | cRMSE                | $1.5 \times 10^{-2}$ | $5.0 \times 10^{-4}$ | $5.5 \times 10^{-3}$ |
|               |               | bRMSE                | $6.4 \times 10^{-2}$ | $4.3 \times 10^{-3}$ | $6.8 \times 10^{-1}$ |
|               |               | fRMSE low            | $1.2 \times 10^{-2}$ | $4.1 \times 10^{-4}$ | $1.8 \times 10^{-1}$ |
|               |               | fRMSE mid            | $5.6 \times 10^{-3}$ | $4.4 \times 10^{-4}$ | $4.9 \times 10^{-4}$ |
|               |               | fRMSE high           | $8.6 \times 10^{-4}$ | $2.9 \times 10^{-4}$ | $6.1 \times 10^{-6}$ |
|               | $\beta = 0.4$ | RMSE                 | $3.6 \times 10^{-1}$ | $5.9 \times 10^{-3}$ | $9.2 \times 10^{-1}$ |
|               |               | nRMSE                | $6.7 \times 10^{-1}$ | $1.1 \times 10^{-2}$ | $1.1 \times 10^{+0}$ |
|               |               | max error            | $1.7 \times 10^{+0}$ | $2.0 \times 10^{-1}$ | $1.7 \times 10^{+0}$ |
|               |               | cRMSE                | $2.6 \times 10^{-1}$ | $4.6 \times 10^{-4}$ | $1.9 \times 10^{-3}$ |
|               |               | bRMSE                | $3.7 \times 10^{-1}$ | $5.5 \times 10^{-3}$ | $7.7 \times 10^{-1}$ |
|               |               | fRMSE low            | $1.3 \times 10^{-1}$ | $4.4 \times 10^{-4}$ | $2.1 \times 10^{-1}$ |
|               |               | fRMSE mid            | $2.3 \times 10^{-2}$ | $4.7 \times 10^{-4}$ | $3.4 \times 10^{-3}$ |
|               |               | fRMSE high           | $2.3 \times 10^{-3}$ | $3.4 \times 10^{-4}$ | $9.8 \times 10^{-6}$ |
|               | $\beta = 1.0$ | RMSE                 | $1.2 \times 10^{-2}$ | $3.5 \times 10^{-3}$ | $4.0 \times 10^{-1}$ |
|               |               | nRMSE                | $2.0 \times 10^{-2}$ | $5.9 \times 10^{-3}$ | $4.7 \times 10^{-1}$ |
|               |               | max error            | $1.7 \times 10^{-1}$ | $8.5 \times 10^{-2}$ | $7.6 \times 10^{-1}$ |
|               |               | cRMSE                | $6.6 \times 10^{-3}$ | $1.8 \times 10^{-4}$ | $6.0 \times 10^{-3}$ |
| bRMSE         |               | $3.0 \times 10^{-2}$ | $2.6 \times 10^{-3}$ | $3.0 \times 10^{-1}$ |                      |
| fRMSE low     |               | $3.8 \times 10^{-3}$ | $1.7 \times 10^{-4}$ | $9.7 \times 10^{-2}$ |                      |
| fRMSE mid     |               | $1.5 \times 10^{-3}$ | $2.1 \times 10^{-4}$ | $1.2 \times 10^{-3}$ |                      |
| fRMSE high    |               | $4.3 \times 10^{-4}$ | $2.2 \times 10^{-4}$ | $2.2 \times 10^{-5}$ |                      |
| $\beta = 4.0$ | RMSE          | $1.6 \times 10^{-2}$ | $5.8 \times 10^{-3}$ | $6.6 \times 10^{-1}$ |                      |
|               | nRMSE         | $2.6 \times 10^{-2}$ | $1.0 \times 10^{-2}$ | $7.7 \times 10^{-1}$ |                      |
|               | max error     | $1.4 \times 10^{-1}$ | $1.1 \times 10^{-1}$ | $1.0 \times 10^{+0}$ |                      |
|               | cRMSE         | $8.1 \times 10^{-3}$ | $3.9 \times 10^{-4}$ | $2.0 \times 10^{-2}$ |                      |
|               | bRMSE         | $3.0 \times 10^{-2}$ | $5.1 \times 10^{-3}$ | $5.5 \times 10^{-1}$ |                      |
|               | fRMSE low     | $4.6 \times 10^{-3}$ | $4.9 \times 10^{-4}$ | $1.5 \times 10^{-1}$ |                      |
|               | fRMSE mid     | $1.8 \times 10^{-3}$ | $5.7 \times 10^{-4}$ | $3.4 \times 10^{-4}$ |                      |
|               | fRMSE high    | $4.7 \times 10^{-4}$ | $2.9 \times 10^{-4}$ | $1.5 \times 10^{-5}$ |                      |

Table 7: Summary of the baseline models’ performance for different evaluation metrics: RMSE, normalised RMSE (nRMSE), RMSE from conserved value (cRMSE), maximum error, RMSE at the boundaries (bRMSE), RMSE in Fourier space at low (fRMSE low), medium (fRMSE mid), and high frequency (fRMSE high) ranges applied to the Burgers’ equation with different parameter values.

| PDE        | Parameter     | Metric               | Baseline model       |                      |                      |
|------------|---------------|----------------------|----------------------|----------------------|----------------------|
|            |               |                      | U-Net                | FNO                  | PINN                 |
| Burgers’   | $\nu = 0.001$ | RMSE                 | $1.1 \times 10^{-1}$ | $1.3 \times 10^{-2}$ | $5.3 \times 10^{-1}$ |
|            |               | nRMSE                | $3.4 \times 10^{-1}$ | $4.2 \times 10^{-2}$ | $9.6 \times 10^{-1}$ |
|            |               | max error            | $5.7 \times 10^{-1}$ | $2.8 \times 10^{-1}$ | $8.2 \times 10^{-1}$ |
|            |               | cRMSE                | $5.9 \times 10^{-2}$ | $8.5 \times 10^{-4}$ | $5.1 \times 10^{-1}$ |
|            |               | bRMSE                | $1.0 \times 10^{-1}$ | $9.3 \times 10^{-3}$ | $5.2 \times 10^{-1}$ |
|            |               | fRMSE low            | $4.1 \times 10^{-2}$ | $8.7 \times 10^{-4}$ | $1.6 \times 10^{-1}$ |
|            |               | fRMSE mid            | $1.1 \times 10^{-2}$ | $1.2 \times 10^{-3}$ | $1.3 \times 10^{-2}$ |
|            |               | fRMSE high           | $1.5 \times 10^{-3}$ | $7.7 \times 10^{-4}$ | $4.7 \times 10^{-4}$ |
|            | $\nu = 0.01$  | RMSE                 | $9.7 \times 10^{-2}$ | $6.4 \times 10^{-3}$ | $5.3 \times 10^{-1}$ |
|            |               | nRMSE                | $3.0 \times 10^{-1}$ | $2.0 \times 10^{-2}$ | $9.5 \times 10^{-1}$ |
|            |               | max error            | $5.4 \times 10^{-1}$ | $1.5 \times 10^{-1}$ | $7.5 \times 10^{-1}$ |
|            |               | cRMSE                | $4.0 \times 10^{-2}$ | $7.2 \times 10^{-4}$ | $4.7 \times 10^{-1}$ |
|            |               | bRMSE                | $9.7 \times 10^{-2}$ | $7.6 \times 10^{-3}$ | $4.8 \times 10^{-1}$ |
|            |               | fRMSE low            | $3.5 \times 10^{-2}$ | $7.8 \times 10^{-4}$ | $1.8 \times 10^{-1}$ |
|            |               | fRMSE mid            | $1.0 \times 10^{-2}$ | $9.6 \times 10^{-4}$ | $2.3 \times 10^{-2}$ |
|            |               | fRMSE high           | $9.6 \times 10^{-4}$ | $5.2 \times 10^{-4}$ | $1.2 \times 10^{-3}$ |
|            | $\nu = 0.1$   | RMSE                 | $7.5 \times 10^{-2}$ | $1.4 \times 10^{-3}$ | $4.9 \times 10^{-1}$ |
|            |               | nRMSE                | $2.8 \times 10^{-1}$ | $4.5 \times 10^{-3}$ | $8.8 \times 10^{-1}$ |
|            |               | max error            | $4.6 \times 10^{-1}$ | $3.0 \times 10^{-2}$ | $6.6 \times 10^{-1}$ |
|            |               | cRMSE                | $3.0 \times 10^{-2}$ | $4.5 \times 10^{-4}$ | $4.7 \times 10^{-1}$ |
|            |               | bRMSE                | $1.0 \times 10^{-1}$ | $2.5 \times 10^{-3}$ | $3.4 \times 10^{-1}$ |
|            |               | fRMSE low            | $2.9 \times 10^{-2}$ | $4.2 \times 10^{-4}$ | $1.5 \times 10^{-1}$ |
|            |               | fRMSE mid            | $5.6 \times 10^{-3}$ | $3.1 \times 10^{-4}$ | $1.0 \times 10^{-2}$ |
|            |               | fRMSE high           | $8.4 \times 10^{-4}$ | $5.4 \times 10^{-5}$ | $5.1 \times 10^{-4}$ |
|            | $\nu = 1.0$   | RMSE                 | $6.0 \times 10^{-2}$ | $8.1 \times 10^{-4}$ | $5.4 \times 10^{-1}$ |
|            |               | nRMSE                | $3.6 \times 10^{-1}$ | $3.1 \times 10^{-3}$ | $9.9 \times 10^{-1}$ |
|            |               | max error            | $3.9 \times 10^{-1}$ | $5.9 \times 10^{-3}$ | $7.1 \times 10^{-1}$ |
|            |               | cRMSE                | $6.4 \times 10^{-2}$ | $2.4 \times 10^{-4}$ | $5.3 \times 10^{-1}$ |
| bRMSE      |               | $6.6 \times 10^{-2}$ | $8.6 \times 10^{-4}$ | $6.1 \times 10^{-1}$ |                      |
| fRMSE low  |               | $2.5 \times 10^{-2}$ | $3.2 \times 10^{-4}$ | $1.5 \times 10^{-1}$ |                      |
| fRMSE mid  |               | $3.0 \times 10^{-3}$ | $2.4 \times 10^{-5}$ | $4.9 \times 10^{-3}$ |                      |
| fRMSE high |               | $5.9 \times 10^{-4}$ | $4.9 \times 10^{-6}$ | $2.6 \times 10^{-4}$ |                      |

Table 8: Summary of the baseline models' performance for different evaluation metrics: RMSE, normalised RMSE (nRMSE), RMSE from conserved value (cRMSE), maximum error, RMSE at the boundaries (bRMSE), RMSE in Fourier space at low (fRMSE low), medium (fRMSE mid), and high frequency (fRMSE high) ranges applied to the Darcy flow equation with different parameter values.

| PDE             | Parameter      | Metric               | Baseline model       |                      |
|-----------------|----------------|----------------------|----------------------|----------------------|
|                 |                |                      | U-Net                | FNO                  |
| DarcyFlow       | $\beta = 0.01$ | RMSE                 | $4.0 \times 10^{-3}$ | $8.0 \times 10^{-3}$ |
|                 |                | nRMSE                | $1.1 \times 10^{+0}$ | $2.5 \times 10^{+0}$ |
|                 |                | max error            | $6.8 \times 10^{-2}$ | $1.5 \times 10^{-1}$ |
|                 |                | cRMSE                | $5.8 \times 10^{-3}$ | $1.3 \times 10^{-2}$ |
|                 |                | bRMSE                | $6.3 \times 10^{-4}$ | $4.7 \times 10^{-3}$ |
|                 |                | fRMSE low            | $2.5 \times 10^{-3}$ | $5.2 \times 10^{-3}$ |
|                 |                | fRMSE mid            | $1.3 \times 10^{-4}$ | $1.5 \times 10^{-4}$ |
|                 |                | fRMSE high           | $2.1 \times 10^{-5}$ | $1.6 \times 10^{-5}$ |
|                 | $\beta = 0.1$  | RMSE                 | $4.8 \times 10^{-3}$ | $6.2 \times 10^{-3}$ |
|                 |                | nRMSE                | $1.8 \times 10^{-1}$ | $2.2 \times 10^{-1}$ |
|                 |                | max error            | $7.0 \times 10^{-2}$ | $8.9 \times 10^{-2}$ |
|                 |                | cRMSE                | $6.0 \times 10^{-3}$ | $7.7 \times 10^{-3}$ |
|                 |                | bRMSE                | $8.6 \times 10^{-4}$ | $5.0 \times 10^{-3}$ |
|                 |                | fRMSE low            | $2.6 \times 10^{-3}$ | $3.6 \times 10^{-3}$ |
|                 |                | fRMSE mid            | $1.9 \times 10^{-4}$ | $2.6 \times 10^{-4}$ |
|                 |                | fRMSE high           | $4.4 \times 10^{-5}$ | $4.5 \times 10^{-5}$ |
|                 | $\beta = 1.0$  | RMSE                 | $6.4 \times 10^{-3}$ | $1.2 \times 10^{-2}$ |
|                 |                | nRMSE                | $3.3 \times 10^{-2}$ | $6.4 \times 10^{-2}$ |
|                 |                | max error            | $9.0 \times 10^{-2}$ | $1.1 \times 10^{-1}$ |
|                 |                | cRMSE                | $6.0 \times 10^{-3}$ | $1.1 \times 10^{-2}$ |
| bRMSE           |                | $3.5 \times 10^{-3}$ | $5.5 \times 10^{-3}$ |                      |
| fRMSE low       |                | $3.0 \times 10^{-3}$ | $5.2 \times 10^{-3}$ |                      |
| fRMSE mid       |                | $3.4 \times 10^{-4}$ | $5.1 \times 10^{-4}$ |                      |
| fRMSE high      |                | $1.3 \times 10^{-4}$ | $1.5 \times 10^{-4}$ |                      |
| $\beta = 10.0$  | RMSE           | $1.4 \times 10^{-2}$ | $2.1 \times 10^{-2}$ |                      |
|                 | nRMSE          | $8.2 \times 10^{-3}$ | $1.2 \times 10^{-2}$ |                      |
|                 | max error      | $2.4 \times 10^{-1}$ | $3.2 \times 10^{-1}$ |                      |
|                 | cRMSE          | $9.9 \times 10^{-3}$ | $1.5 \times 10^{-2}$ |                      |
|                 | bRMSE          | $9.4 \times 10^{-3}$ | $1.6 \times 10^{-2}$ |                      |
|                 | fRMSE low      | $5.8 \times 10^{-3}$ | $8.3 \times 10^{-3}$ |                      |
|                 | fRMSE mid      | $9.8 \times 10^{-4}$ | $1.3 \times 10^{-3}$ |                      |
|                 | fRMSE high     | $3.6 \times 10^{-4}$ | $5.7 \times 10^{-4}$ |                      |
| $\beta = 100.0$ | RMSE           | $7.3 \times 10^{-2}$ | $1.1 \times 10^{-1}$ |                      |
|                 | nRMSE          | $4.4 \times 10^{-3}$ | $6.4 \times 10^{-3}$ |                      |
|                 | max error      | $1.7 \times 10^{+0}$ | $2.1 \times 10^{+0}$ |                      |
|                 | cRMSE          | $5.1 \times 10^{-2}$ | $8.9 \times 10^{-2}$ |                      |
|                 | bRMSE          | $4.6 \times 10^{-2}$ | $7.9 \times 10^{-2}$ |                      |
|                 | fRMSE low      | $2.9 \times 10^{-2}$ | $4.6 \times 10^{-2}$ |                      |
|                 | fRMSE mid      | $5.3 \times 10^{-3}$ | $7.6 \times 10^{-3}$ |                      |
|                 | fRMSE high     | $2.5 \times 10^{-3}$ | $3.6 \times 10^{-3}$ |                      |

Table 9: Summary of the baseline models' performance for different evaluation metrics: RMSE, normalised RMSE (nRMSE), RMSE from conserved value (cRMSE), maximum error, RMSE at the boundaries (bRMSE), RMSE in Fourier space at low (fRMSE low), medium (fRMSE mid), and high frequency (fRMSE high) ranges applied to the 1d diffusion-reaction equation with different parameter values.

| PDE                      | Parameter                | Metric               | Baseline model       |                      |                      |
|--------------------------|--------------------------|----------------------|----------------------|----------------------|----------------------|
|                          |                          |                      | U-Net                | FNO                  | PINN                 |
| ReacDiff                 | $\nu = 0.5, \rho = 1.0$  | RMSE                 | $3.1 \times 10^{-3}$ | $6.3 \times 10^{-4}$ | $4.5 \times 10^{-2}$ |
|                          |                          | nRMSE                | $6.0 \times 10^{-3}$ | $1.4 \times 10^{-3}$ | $8.0 \times 10^{-2}$ |
|                          |                          | max error            | $1.8 \times 10^{-2}$ | $8.7 \times 10^{-3}$ | $7.6 \times 10^{-2}$ |
|                          |                          | cRMSE                | $2.5 \times 10^{-3}$ | $1.3 \times 10^{-3}$ | $4.3 \times 10^{-2}$ |
|                          |                          | bRMSE                | $3.7 \times 10^{-3}$ | $6.7 \times 10^{-4}$ | $7.5 \times 10^{-2}$ |
|                          |                          | fRMSE low            | $1.1 \times 10^{-3}$ | $4.1 \times 10^{-4}$ | $1.4 \times 10^{-2}$ |
|                          |                          | fRMSE mid            | $1.8 \times 10^{-4}$ | $9.1 \times 10^{-6}$ | $2.4 \times 10^{-4}$ |
|                          |                          | fRMSE high           | $1.8 \times 10^{-5}$ | $1.7 \times 10^{-6}$ | $3.7 \times 10^{-6}$ |
|                          | $\nu = 0.5, \rho = 10.0$ | RMSE                 | $6.2 \times 10^{-8}$ | $0.0 \times 10^{+0}$ | $1.4 \times 10^{-2}$ |
|                          |                          | nRMSE                | $6.5 \times 10^{-8}$ | $0.0 \times 10^{+0}$ | $1.4 \times 10^{-2}$ |
|                          |                          | max error            | $6.2 \times 10^{-8}$ | $0.0 \times 10^{+0}$ | $2.6 \times 10^{-2}$ |
|                          |                          | cRMSE                | $6.2 \times 10^{-8}$ | $0.0 \times 10^{+0}$ | $6.2 \times 10^{-3}$ |
|                          |                          | bRMSE                | $6.2 \times 10^{-8}$ | $0.0 \times 10^{+0}$ | $2.3 \times 10^{-2}$ |
|                          |                          | fRMSE low            | $1.6 \times 10^{-8}$ | $0.0 \times 10^{+0}$ | $4.3 \times 10^{-3}$ |
|                          |                          | fRMSE mid            | $0.0 \times 10^{+0}$ | $0.0 \times 10^{+0}$ | $2.5 \times 10^{-4}$ |
|                          |                          | fRMSE high           | $0.0 \times 10^{+0}$ | $0.0 \times 10^{+0}$ | $2.9 \times 10^{-6}$ |
|                          | $\nu = 2.0, \rho = 1.0$  | RMSE                 | $2.3 \times 10^{-3}$ | $2.9 \times 10^{-4}$ | $3.9 \times 10^{-1}$ |
|                          |                          | nRMSE                | $4.5 \times 10^{-3}$ | $7.0 \times 10^{-4}$ | $7.3 \times 10^{-1}$ |
|                          |                          | max error            | $2.0 \times 10^{-2}$ | $4.2 \times 10^{-3}$ | $3.9 \times 10^{-1}$ |
|                          |                          | cRMSE                | $1.9 \times 10^{-3}$ | $6.4 \times 10^{-4}$ | $3.9 \times 10^{-1}$ |
|                          |                          | bRMSE                | $1.8 \times 10^{-3}$ | $4.1 \times 10^{-4}$ | $3.9 \times 10^{-1}$ |
|                          |                          | fRMSE low            | $7.7 \times 10^{-4}$ | $1.9 \times 10^{-4}$ | $9.7 \times 10^{-2}$ |
|                          |                          | fRMSE mid            | $1.7 \times 10^{-4}$ | $9.2 \times 10^{-6}$ | $6.2 \times 10^{-5}$ |
|                          |                          | fRMSE high           | $2.6 \times 10^{-5}$ | $1.8 \times 10^{-6}$ | $3.4 \times 10^{-6}$ |
| $\nu = 2.0, \rho = 10.0$ | RMSE                     | $3.1 \times 10^{-8}$ | $6.2 \times 10^{-8}$ | $3.2 \times 10^{-2}$ |                      |
|                          | nRMSE                    | $3.2 \times 10^{-8}$ | $6.5 \times 10^{-8}$ | $3.3 \times 10^{-2}$ |                      |
|                          | max error                | $3.1 \times 10^{-8}$ | $6.2 \times 10^{-8}$ | $3.2 \times 10^{-2}$ |                      |
|                          | cRMSE                    | $3.1 \times 10^{-8}$ | $6.2 \times 10^{-8}$ | $3.2 \times 10^{-2}$ |                      |
|                          | bRMSE                    | $3.1 \times 10^{-8}$ | $6.2 \times 10^{-8}$ | $3.1 \times 10^{-2}$ |                      |
|                          | fRMSE low                | $7.8 \times 10^{-9}$ | $1.6 \times 10^{-8}$ | $8.0 \times 10^{-3}$ |                      |
|                          | fRMSE mid                | $0.0 \times 10^{+0}$ | $0.0 \times 10^{+0}$ | $6.4 \times 10^{-6}$ |                      |
|                          | fRMSE high               | $0.0 \times 10^{+0}$ | $0.0 \times 10^{+0}$ | $2.7 \times 10^{-7}$ |                      |



Table 10: Summary of the baseline models' performance for different evaluation metrics: RMSE, normalised RMSE (nRMSE), RMSE from conserved value (cRMSE), maximum error, RMSE at the boundaries (bRMSE), RMSE in Fourier space at low (fRMSE low), medium (fRMSE mid), and high frequency (fRMSE high) ranges applied to the 1d compressible Navier-Stokes equation with different parameter values.

| PDE                     | Parameter                           | Metric               | Baseline model       |                      |
|-------------------------|-------------------------------------|----------------------|----------------------|----------------------|
|                         |                                     |                      | U-Net                | FNO                  |
| 1DCFD                   | $\eta = \zeta = 0.01$ Rand periodic | RMSE                 | $9.9 \times 10^{-1}$ | $2.7 \times 10^{-1}$ |
|                         |                                     | nRMSE                | $3.6 \times 10^{-1}$ | $9.5 \times 10^{-2}$ |
|                         |                                     | max error            | $7.8 \times 10^{+0}$ | $4.1 \times 10^{+0}$ |
|                         |                                     | cRMSE                | $3.6 \times 10^{-1}$ | $5.0 \times 10^{-2}$ |
|                         |                                     | bRMSE                | $1.0 \times 10^{+0}$ | $2.2 \times 10^{-1}$ |
|                         |                                     | fRMSE low            | $3.6 \times 10^{-1}$ | $7.3 \times 10^{-2}$ |
|                         |                                     | fRMSE mid            | $1.2 \times 10^{-1}$ | $5.5 \times 10^{-2}$ |
|                         |                                     | fRMSE high           | $9.2 \times 10^{-3}$ | $3.7 \times 10^{-3}$ |
|                         | $\eta = \zeta = 0.1$ Rand periodic  | RMSE                 | $6.6 \times 10^{-1}$ | $9.3 \times 10^{-2}$ |
|                         |                                     | nRMSE                | $7.2 \times 10^{-1}$ | $6.8 \times 10^{-2}$ |
|                         |                                     | max error            | $5.3 \times 10^{+0}$ | $1.5 \times 10^{+0}$ |
|                         |                                     | cRMSE                | $3.5 \times 10^{-1}$ | $2.7 \times 10^{-2}$ |
|                         |                                     | bRMSE                | $6.8 \times 10^{-1}$ | $7.6 \times 10^{-2}$ |
|                         |                                     | fRMSE low            | $2.5 \times 10^{-1}$ | $2.8 \times 10^{-2}$ |
|                         |                                     | fRMSE mid            | $5.7 \times 10^{-2}$ | $1.3 \times 10^{-2}$ |
|                         |                                     | fRMSE high           | $7.7 \times 10^{-3}$ | $2.0 \times 10^{-3}$ |
|                         | inviscid Rand periodic              | RMSE                 | $1.7 \times 10^{+1}$ | $4.7 \times 10^{-1}$ |
|                         |                                     | nRMSE                | $1.1 \times 10^{+0}$ | $1.2 \times 10^{-1}$ |
|                         |                                     | max error            | $2.0 \times 10^{+1}$ | $7.1 \times 10^{+0}$ |
|                         |                                     | cRMSE                | $1.7 \times 10^{+1}$ | $6.7 \times 10^{-2}$ |
|                         |                                     | bRMSE                | $1.6 \times 10^{+1}$ | $3.5 \times 10^{-1}$ |
|                         |                                     | fRMSE low            | $5.3 \times 10^{-1}$ | $4.5 \times 10^{+0}$ |
|                         |                                     | fRMSE mid            | $1.9 \times 10^{-1}$ | $1.6 \times 10^{-1}$ |
|                         |                                     | fRMSE high           | $2.1 \times 10^{-2}$ | $2.6 \times 10^{-3}$ |
| inviscid Rand Outgoing  | RMSE                                | $1.6 \times 10^{+0}$ | $2.6 \times 10^{-1}$ |                      |
|                         | nRMSE                               | $1.1 \times 10^{+1}$ | $6.7 \times 10^{+0}$ |                      |
|                         | max error                           | $1.2 \times 10^{+1}$ | $4.3 \times 10^{+0}$ |                      |
|                         | cRMSE                               | $1.5 \times 10^{+0}$ | $1.5 \times 10^{-1}$ |                      |
|                         | bRMSE                               | $1.8 \times 10^{+0}$ | $3.6 \times 10^{-1}$ |                      |
|                         | fRMSE low                           | $6.8 \times 10^{-1}$ | $9.0 \times 10^{-2}$ |                      |
|                         | fRMSE mid                           | $1.2 \times 10^{-1}$ | $4.5 \times 10^{-2}$ |                      |
|                         | fRMSE high                          | $1.6 \times 10^{-2}$ | $6.7 \times 10^{-3}$ |                      |
| inviscid Shock Outgoing | RMSE                                | $4.1 \times 10^{-1}$ | $1.6 \times 10^{-1}$ |                      |
|                         | nRMSE                               | $1.7 \times 10^{-1}$ | $4.7 \times 10^{-2}$ |                      |
|                         | max error                           | $6.6 \times 10^{+0}$ | $3.8 \times 10^{+0}$ |                      |
|                         | cRMSE                               | $2.1 \times 10^{-1}$ | $5.3 \times 10^{-2}$ |                      |
|                         | bRMSE                               | $5.6 \times 10^{-1}$ | $2.4 \times 10^{-1}$ |                      |
|                         | fRMSE low                           | $1.4 \times 10^{-1}$ | $3.7 \times 10^{-2}$ |                      |
|                         | fRMSE mid                           | $5.3 \times 10^{-2}$ | $2.6 \times 10^{-2}$ |                      |
|                         | fRMSE high                          | $1.1 \times 10^{-2}$ | $6.7 \times 10^{-3}$ |                      |

Table 11: Summary of the baseline models' performance for different evaluation metrics: RMSE, normalised RMSE (nRMSE), RMSE from conserved value (cRMSE), maximum error, RMSE at the boundaries (bRMSE), RMSE in Fourier space at low (fRMSE low), medium (fRMSE mid), and high frequency (fRMSE high) ranges applied to the 2d compressible Navier-Stokes equation with different parameter values (first part).

| PDE                                   | Parameter                                       | Metric               | Baseline model       |                      |
|---------------------------------------|-------------------------------------------------|----------------------|----------------------|----------------------|
|                                       |                                                 |                      | U-Net                | FNO                  |
| 2DCFD                                 | $M = 0.1$ , inviscid<br>Rand periodic           | RMSE                 | $4.0 \times 10^{-1}$ | $2.6 \times 10^{-1}$ |
|                                       |                                                 | nRMSE                | $6.6 \times 10^{-1}$ | $2.8 \times 10^{-1}$ |
|                                       |                                                 | max error            | $5.1 \times 10^{+0}$ | $4.2 \times 10^{+0}$ |
|                                       |                                                 | cRMSE                | $1.5 \times 10^{-1}$ | $1.6 \times 10^{-2}$ |
|                                       |                                                 | bRMSE                | $4.3 \times 10^{-1}$ | $2.6 \times 10^{-1}$ |
|                                       |                                                 | fRMSE low            | $1.1 \times 10^{-1}$ | $4.5 \times 10^{-2}$ |
|                                       |                                                 | fRMSE mid            | $4.8 \times 10^{-2}$ | $4.4 \times 10^{-2}$ |
|                                       |                                                 | fRMSE high           | $1.7 \times 10^{-2}$ | $1.6 \times 10^{-2}$ |
|                                       | $M = 0.1, \eta = \zeta = 0.01$<br>Rand periodic | RMSE                 | $9.1 \times 10^{-2}$ | $2.3 \times 10^{-2}$ |
|                                       |                                                 | nRMSE                | $7.1 \times 10^{-1}$ | $1.7 \times 10^{-1}$ |
|                                       |                                                 | max error            | $1.1 \times 10^{+0}$ | $4.0 \times 10^{-1}$ |
|                                       |                                                 | cRMSE                | $3.6 \times 10^{-2}$ | $5.3 \times 10^{-3}$ |
|                                       |                                                 | bRMSE                | $1.1 \times 10^{-1}$ | $2.2 \times 10^{-2}$ |
|                                       |                                                 | fRMSE low            | $2.7 \times 10^{-2}$ | $5.7 \times 10^{-3}$ |
|                                       |                                                 | fRMSE mid            | $8.2 \times 10^{-3}$ | $2.7 \times 10^{-3}$ |
|                                       |                                                 | fRMSE high           | $2.6 \times 10^{-3}$ | $6.3 \times 10^{-4}$ |
|                                       | $M = 0.1, \eta = \zeta = 0.1$<br>Rand periodic  | RMSE                 | $4.7 \times 10^{-2}$ | $4.9 \times 10^{-3}$ |
|                                       |                                                 | nRMSE                | $5.1 \times 10^{+0}$ | $3.6 \times 10^{-1}$ |
|                                       |                                                 | max error            | $6.7 \times 10^{-1}$ | $8.7 \times 10^{-2}$ |
|                                       |                                                 | cRMSE                | $3.2 \times 10^{-2}$ | $3.2 \times 10^{-3}$ |
|                                       |                                                 | bRMSE                | $6.6 \times 10^{-2}$ | $4.3 \times 10^{-3}$ |
|                                       |                                                 | fRMSE low            | $1.3 \times 10^{-2}$ | $1.4 \times 10^{-3}$ |
|                                       |                                                 | fRMSE mid            | $4.2 \times 10^{-3}$ | $4.3 \times 10^{-4}$ |
|                                       |                                                 | fRMSE high           | $2.2 \times 10^{-3}$ | $1.4 \times 10^{-4}$ |
| $M = 1.0$ , inviscid<br>Rand periodic | RMSE                                            | $1.5 \times 10^{+0}$ | $1.4 \times 10^{+0}$ |                      |
|                                       | nRMSE                                           | $4.7 \times 10^{-1}$ | $3.5 \times 10^{-1}$ |                      |
|                                       | max error                                       | $1.6 \times 10^{+1}$ | $1.6 \times 10^{+1}$ |                      |
|                                       | cRMSE                                           | $4.8 \times 10^{-1}$ | $1.6 \times 10^{-1}$ |                      |
|                                       | bRMSE                                           | $1.5 \times 10^{+0}$ | $1.3 \times 10^{+0}$ |                      |
|                                       | fRMSE low                                       | $4.8 \times 10^{-1}$ | $4.0 \times 10^{-1}$ |                      |
|                                       | fRMSE mid                                       | $1.2 \times 10^{-1}$ | $1.2 \times 10^{-1}$ |                      |
|                                       | fRMSE high                                      | $3.9 \times 10^{-2}$ | $3.9 \times 10^{-2}$ |                      |

Table 12: Summary of the baseline models' performance for different evaluation metrics: RMSE, normalised RMSE (nRMSE), RMSE from conserved value (cRMSE), maximum error, RMSE at the boundaries (bRMSE), RMSE in Fourier space at low (fRMSE low), medium (fRMSE mid), and high frequency (fRMSE high) ranges applied to the 2d compressible Navier-Stokes equation with different parameter values (second part).

| PDE        | Parameter                                       | Metric               | Baseline model       |                      |
|------------|-------------------------------------------------|----------------------|----------------------|----------------------|
|            |                                                 |                      | U-Net                | FNO                  |
| 2DCFD      | $M = 1.0, \eta = \zeta = 0.01$<br>Rand periodic | RMSE                 | $3.4 \times 10^{-1}$ | $1.2 \times 10^{-1}$ |
|            |                                                 | nRMSE                | $3.6 \times 10^{-1}$ | $9.6 \times 10^{-2}$ |
|            |                                                 | max error            | $3.7 \times 10^{+0}$ | $1.7 \times 10^{+0}$ |
|            |                                                 | cRMSE                | $1.1 \times 10^{-1}$ | $1.8 \times 10^{-2}$ |
|            |                                                 | bRMSE                | $3.6 \times 10^{-1}$ | $1.3 \times 10^{-1}$ |
|            |                                                 | fRMSE low            | $1.1 \times 10^{-1}$ | $3.3 \times 10^{-2}$ |
|            |                                                 | fRMSE mid            | $2.7 \times 10^{-2}$ | $1.5 \times 10^{-2}$ |
|            |                                                 | fRMSE high           | $6.2 \times 10^{-3}$ | $3.6 \times 10^{-3}$ |
|            | $M = 1.0, \eta = \zeta = 0.1$<br>Rand periodic  | RMSE                 | $1.1 \times 10^{-1}$ | $1.5 \times 10^{-2}$ |
|            |                                                 | nRMSE                | $9.2 \times 10^{-1}$ | $9.8 \times 10^{-2}$ |
|            |                                                 | max error            | $1.3 \times 10^{+0}$ | $2.4 \times 10^{-1}$ |
|            |                                                 | cRMSE                | $4.8 \times 10^{-2}$ | $4.8 \times 10^{-3}$ |
|            |                                                 | bRMSE                | $1.5 \times 10^{-1}$ | $1.7 \times 10^{-2}$ |
|            |                                                 | fRMSE low            | $3.0 \times 10^{-2}$ | $3.2 \times 10^{-3}$ |
|            |                                                 | fRMSE mid            | $1.3 \times 10^{-2}$ | $1.5 \times 10^{-3}$ |
|            |                                                 | fRMSE high           | $4.3 \times 10^{-3}$ | $8.9 \times 10^{-4}$ |
|            | $M = 0.1$ , inviscid Turb<br>periodic           | RMSE                 | $3.3 \times 10^{-1}$ | $2.8 \times 10^{-1}$ |
|            |                                                 | nRMSE                | $1.9 \times 10^{-1}$ | $1.6 \times 10^{-1}$ |
|            |                                                 | max error            | $2.2 \times 10^{+0}$ | $1.8 \times 10^{+0}$ |
|            |                                                 | cRMSE                | $1.5 \times 10^{-2}$ | $1.2 \times 10^{-2}$ |
|            |                                                 | bRMSE                | $3.6 \times 10^{-1}$ | $2.8 \times 10^{-1}$ |
|            |                                                 | fRMSE low            | $6.5 \times 10^{-2}$ | $5.0 \times 10^{-2}$ |
|            |                                                 | fRMSE mid            | $3.2 \times 10^{-2}$ | $3.1 \times 10^{-2}$ |
|            |                                                 | fRMSE high           | $8.5 \times 10^{-3}$ | $6.5 \times 10^{-3}$ |
|            | $M = 1.0$ , inviscid<br>Turb periodic           | RMSE                 | $9.5 \times 10^{-2}$ | $9.2 \times 10^{-2}$ |
|            |                                                 | nRMSE                | $1.4 \times 10^{-1}$ | $1.3 \times 10^{-1}$ |
|            |                                                 | max error            | $8.2 \times 10^{-1}$ | $7.9 \times 10^{-1}$ |
|            |                                                 | cRMSE                | $6.5 \times 10^{-3}$ | $4.3 \times 10^{-3}$ |
| bRMSE      |                                                 | $1.1 \times 10^{-1}$ | $9.7 \times 10^{-1}$ |                      |
| fRMSE low  |                                                 | $1.3 \times 10^{-2}$ | $1.1 \times 10^{-2}$ |                      |
| fRMSE mid  |                                                 | $1.2 \times 10^{-2}$ | $1.2 \times 10^{-2}$ |                      |
| fRMSE high |                                                 | $5.2 \times 10^{-3}$ | $5.2 \times 10^{-3}$ |                      |

Table 13: Summary of the baseline models’ performance for different evaluation metrics: RMSE, normalised RMSE (nRMSE), RMSE from conserved value (cRMSE), maximum error, RMSE at the boundaries (bRMSE), RMSE in Fourier space at low (fRMSE low), medium (fRMSE mid), and high frequency (fRMSE high) ranges applied to the 3d compressible Navier-Stokes equation with different parameter values.

| PDE        | Parameter                           | Metric               | Baseline model       |                      |
|------------|-------------------------------------|----------------------|----------------------|----------------------|
|            |                                     |                      | U-Net                | FNO                  |
| 3DCFD      | $M = 1.0$ inviscid<br>Rand periodic | RMSE                 | $2.2 \times 10^{+0}$ | $6.0 \times 10^{-1}$ |
|            |                                     | nRMSE                | $1.0 \times 10^{+0}$ | $3.7 \times 10^{-1}$ |
|            |                                     | max error            | $9.0 \times 10^{+0}$ | $3.6 \times 10^{+0}$ |
|            |                                     | cRMSE                | $2.3 \times 10^{+0}$ | $8.1 \times 10^{-2}$ |
|            |                                     | bRMSE                | $2.1 \times 10^{+0}$ | $6.0 \times 10^{-1}$ |
|            |                                     | fRMSE low            | $7.3 \times 10^{-1}$ | $1.1 \times 10^{-1}$ |
|            |                                     | fRMSE mid            | $7.6 \times 10^{-2}$ | $4.4 \times 10^{-2}$ |
|            |                                     | fRMSE high           | $2.3 \times 10^{-2}$ | $9.3 \times 10^{-3}$ |
|            | $M = 1.0$ inviscid<br>Turb periodic | RMSE                 | $8.1 \times 10^{-2}$ | $8.2 \times 10^{-2}$ |
|            |                                     | nRMSE                | $2.3 \times 10^{-1}$ | $2.4 \times 10^{-1}$ |
|            |                                     | max error            | $5.0 \times 10^{-1}$ | $4.5 \times 10^{-1}$ |
|            |                                     | cRMSE                | $7.3 \times 10^{-3}$ | $2.8 \times 10^{-3}$ |
|            |                                     | bRMSE                | $9.9 \times 10^{-2}$ | $8.6 \times 10^{-2}$ |
|            |                                     | fRMSE low            | $1.1 \times 10^{-2}$ | $7.2 \times 10^{-3}$ |
| fRMSE mid  | $8.0 \times 10^{-3}$                | $9.4 \times 10^{-3}$ |                      |                      |
| fRMSE high | $1.7 \times 10^{-3}$                | $4.5 \times 10^{-3}$ |                      |                      |

## F Detailed Runtime Comparison

In this section we present the detailed comparison of computation time between the PDE solver used to generate the data and the baseline models used in this work, summarized in [Table 15](#). The system listed in [Table 14](#) was used to run all timing measurements regarding the Diffusion-sorption, 2D diffusion-reaction and Shallow-water equation scenarios. PyClaw [\[23\]](#), a well-optimized finite-volume Fortran code, is used as PDE solver for the shallow-water equation data generation. Note that the experiment is only running on a single core due to its small size. Because the PINN model is not discretized, the inference time includes evaluating the trained model at the same discretization points of the reference simulation for the last 20 time steps of the data. E.g. the 2D diffusion-reaction scenario is evaluated at  $128^2 \times 20$  discrete points. Additionally, autoregression is not required and therefore, it leads to significantly faster computation time relative to FNO and U-Net.

Table 14: System configuration 1

|          |                              |
|----------|------------------------------|
| CPU      | $2 \times$ AMD EPYC 7742     |
| GPU      | $1 \times$ NVIDIA Volta V100 |
| Software | PyTorch@1.11, CUDA@11.3      |

Table 15: Comparison of computation time between the PDE solver used to generate a single data sample and single forward runs of FNO, U-Net, and PINN. Training time of the baseline models for one epoch are also presented in this table. The unit used for the time is seconds.

| PDE                    | Resolution | Model      | Training time ( $\frac{s}{epoch}$ ) | Epochs | Inference time (s) |
|------------------------|------------|------------|-------------------------------------|--------|--------------------|
| Diffusion-sorption     | $1024^1$   | PDE solver | –                                   | –      | 59.83              |
|                        |            | FNO        | 97.52                               | 500    | 0.32               |
|                        |            | U-Net      | 96.75                               | 500    | 0.32               |
|                        |            | PINN       | 0.011                               | 15 000 | 0.0027             |
| 2D diffusion-reaction  | $128^2$    | PDE solver | –                                   | –      | 2.21               |
|                        |            | FNO        | 108.28                              | 500    | 0.40               |
|                        |            | U-Net      | 83.19                               | 500    | 0.61               |
|                        |            | PINN       | 0.022                               | 100    | 0.0077             |
| Shallow-water equation | $128^2$    | PDE solver | –                                   | –      | 0.62               |
|                        |            | FNO        | 105.16                              | 500    | 0.37               |
|                        |            | U-Net      | 83.32                               | 500    | 0.56               |
|                        |            | PINN       | 0.041                               | 15 000 | 0.00673            |

As the case for 3D data, we also performed a similar experiment whose results are summarized in [Table 17](#). The used system information is listed in [Table 16](#). Because of the severe memory usage, the resolution was reduced to  $64^3$ , though we provided a data with resolution  $128^3$  in our official dataset. Note that the training and inference time are shorter than the 2D cases in [Table 15](#). This is because the number of time-step and sample numbers are less than the 2D cases to reduce dataset size.

Table 16: System configuration 2

|                        |                                    |
|------------------------|------------------------------------|
| GPU                    | $1 \times$ NVIDIA GeForce RTX 3090 |
| Software (ML methods)  | PyTorch@1.11, CUDA@11.3            |
| Software (simulations) | JAX@0.2.26, CUDA@11.3              |

## G Resolution Sensitivity of Inference Time

[Figure 13](#) plots the resolution dependence of the inference time of classical simulation and ML methods for 2D/3D compressible Navier-Stokes equations cases. To calculate the inference times, we used the same hardware resources to be a "fair" comparison as listed in [Table 16](#).

Table 17: Comparison of computation time between the PDE solver used to generate a single data sample and single forward runs of FNO, U-Net. Training time of the baseline models for one epoch are also presented in this table. The unit used for the time is seconds.

| PDE    | Resolution | Model      | Training time ( $\frac{s}{epoch}$ ) | Epochs | Inference time (s) |
|--------|------------|------------|-------------------------------------|--------|--------------------|
| 3D CFD | $64^3$     | PDE solver | –                                   | –      | 60.07              |
|        |            | FNO        | 24.77                               | 500    | 0.14               |
|        |            | U-Net      | 62.22                               | 500    | 0.27               |

The figure clearly shows that the ML inference time is nearly 3-order of magnitude smaller than that of the classical simulations. Concerning the resolution dependence, both of the ML models show a similar dependence to the inviscid classical simulation method. Importantly, the inference time of ML models is in general independent of the diffusion coefficient, such as viscosity. On the other hand, the classical simulation methods increase their computation time with diffusion coefficient because of the stability condition, known as Courant-Friedrich-Lewy (CFL) condition,  $\Delta t \propto \Delta x^2/\eta$  in the case of the explicit method. Here  $\Delta x$ ,  $\Delta t$  are time-step size and mesh size, respectively, and  $\eta$  is the diffusion coefficient. This is much severer restriction than the inviscid case whose CFL condition is  $\Delta t \propto \Delta x$ . Hence, we can conclude that ML methods could even be suitable for solving for the problem with including strong-diffusive regime.

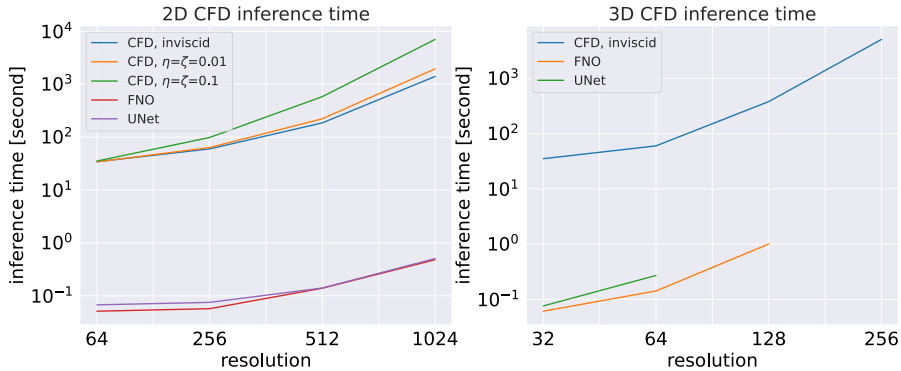

Figure 13: Plots inference time for 2D/3D CFD cases.

## H Error Comparison with PDE Solver

To further assess the benefit of the trained baseline models, we generated the 2D diffusion-reaction data using a PDE solver with higher resolution ( $512 \times 512$ ), and downsampled them to lower resolution ( $128 \times 128$ ). These downsampled data were assumed as the ground truth (low discretization error) and then were used to train the baseline models. The trained baseline model predictions were compared against data that were generated using the same PDE solver but with coarser resolution (higher discretization error). The error comparison is summarized in Table 18. We observed that generating the data with lower resolution already accumulates high discretization error, relative to the baseline model prediction error. However, further sensitivity analysis with regards to different resolutions is required in future works to determine if the resolution is fine enough to be assumed as the ground truth.

## I Visualization of Model Predictions

In this section, we present visualizations of the baseline model predictions, compared against the generated datasets for the diffusion-sorption equation (Figure 14), 2D diffusion-reaction equation (Figure 15, Figure 16, and Figure 17), the shallow-water equation (Figure 18, Figure 19, and Figure 20), 1D Advection equation (Figure 21), 1D Burgers equation (Figure 22), 1D Reaction-Diffusion

Table 18: Error comparison between of U-Net, FNO, and PINN prediction, as well as low-resolution PDE solver data, against the high-resolution PDE solver data (assumed as the ground truth) for the 2D diffusion-reaction scenario.

| Error metric | U-Net                | FNO                  | PINN                 | low-res PDE solver   |
|--------------|----------------------|----------------------|----------------------|----------------------|
| RMSE         | $6.1 \times 10^{-2}$ | $8.1 \times 10^{-3}$ | $1.9 \times 10^{-1}$ | $1.8 \times 10^{-1}$ |
| nRMSE        | $8.4 \times 10^{-1}$ | $1.2 \times 10^{-1}$ | $1.6 \times 10^{+0}$ | $2.8 \times 10^{+0}$ |
| max error    | $1.9 \times 10^{-1}$ | $9.1 \times 10^{-2}$ | $5.0 \times 10^{-1}$ | $8.9 \times 10^{-1}$ |
| cRMSE        | $3.9 \times 10^{-2}$ | $1.7 \times 10^{-3}$ | $1.3 \times 10^{-1}$ | $4.9 \times 10^{-2}$ |
| bRMSE        | $7.8 \times 10^{-2}$ | $2.7 \times 10^{-2}$ | $2.2 \times 10^{-1}$ | $2.1 \times 10^{-1}$ |
| fRMSE low    | $1.7 \times 10^{-2}$ | $8.2 \times 10^{-4}$ | $5.7 \times 10^{-2}$ | $4.9 \times 10^{-2}$ |
| fRMSE mid    | $5.4 \times 10^{-3}$ | $7.7 \times 10^{-4}$ | $1.3 \times 10^{-2}$ | $2.2 \times 10^{-2}$ |
| fRMSE high   | $6.8 \times 10^{-4}$ | $4.1 \times 10^{-4}$ | $1.5 \times 10^{-3}$ | $3.4 \times 10^{-3}$ |

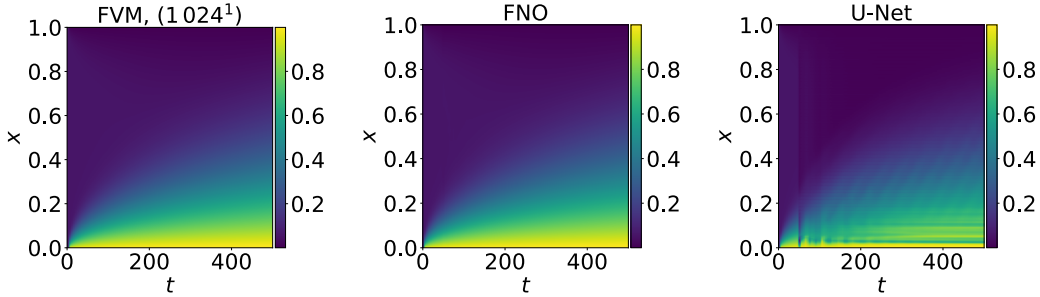

Figure 14: Visualization of the diffusion-sorption equation (a) data, (b) FNO prediction, and (c) U-Net prediction.

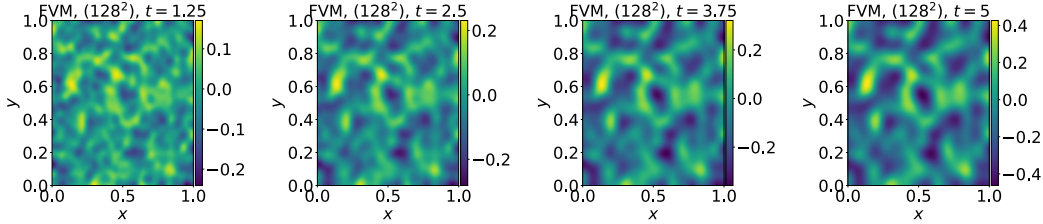

Figure 15: Visualization of the time evolution of the 2D diffusion-reaction equation data.

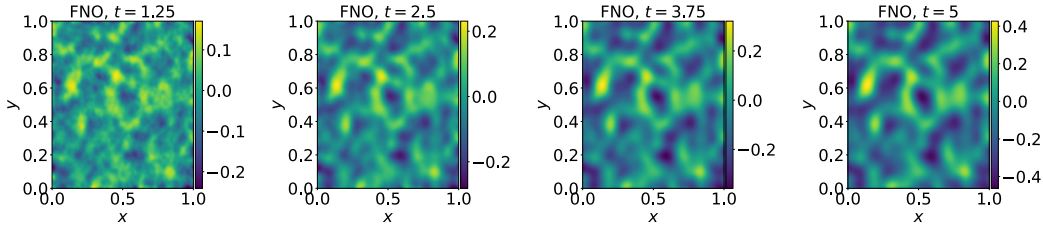

Figure 16: Visualization of the time evolution of the 2D diffusion-reaction equation predicted using FNO.

equation [Figure 23](#), 1D compressible NS equations [Figure 24](#), 2D Darcy flow [Figure 25](#), and 2D compressible NS equations [Figure 26](#)

## J Visualization of Initial Conditions

In this section, we provide a collection of initial condition visualizations for each problem. [Figure 27](#) shows different radius of the initial perturbation used as the initial condition for five different samples

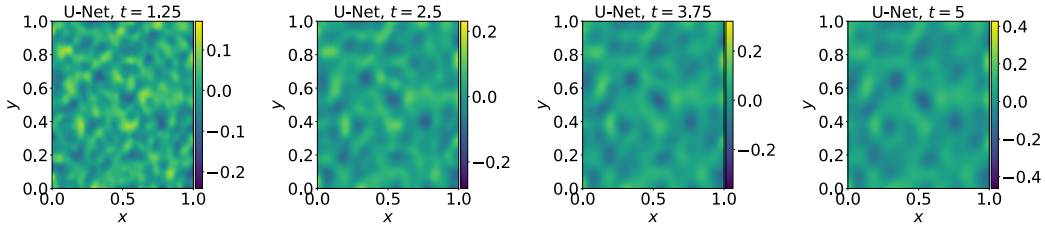

Figure 17: Visualization of the time evolution of the 2D diffusion-reaction equation predicted using U-Net.

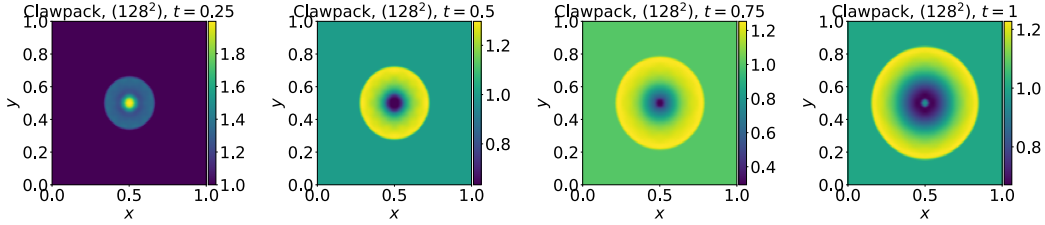

Figure 18: Visualization of the time evolution of the shallow water equation data.

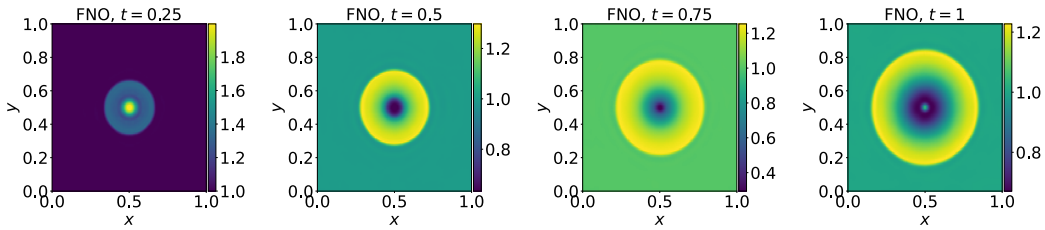

Figure 19: Visualization of the time evolution of the shallow water equation predicted using FNO.

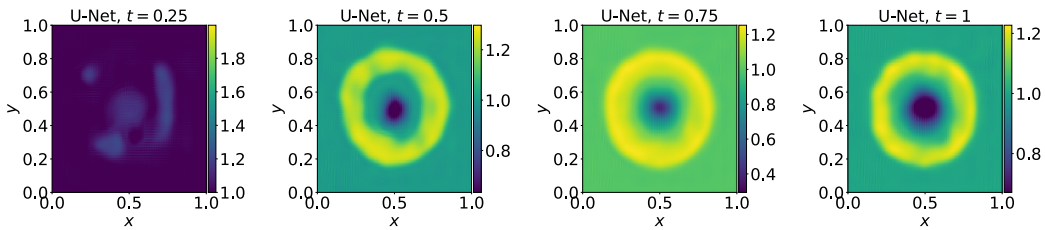

Figure 20: Visualization of the time evolution of the shallow water equation predicted using U-Net.

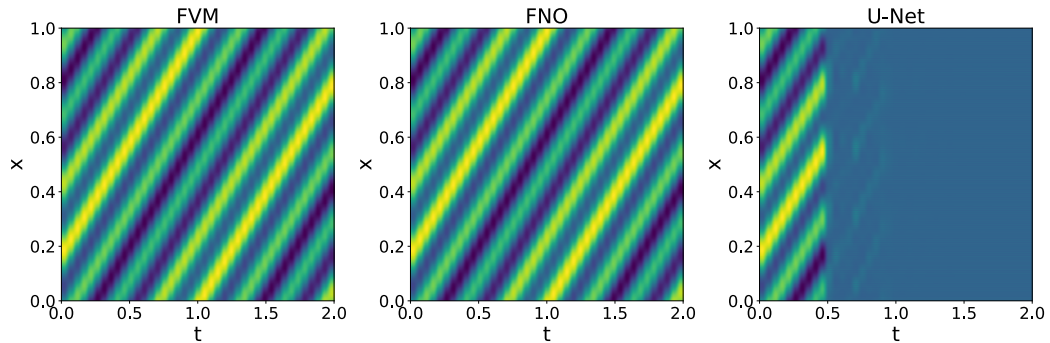

Figure 21: Plots of the predictions for 1D Advection equation.



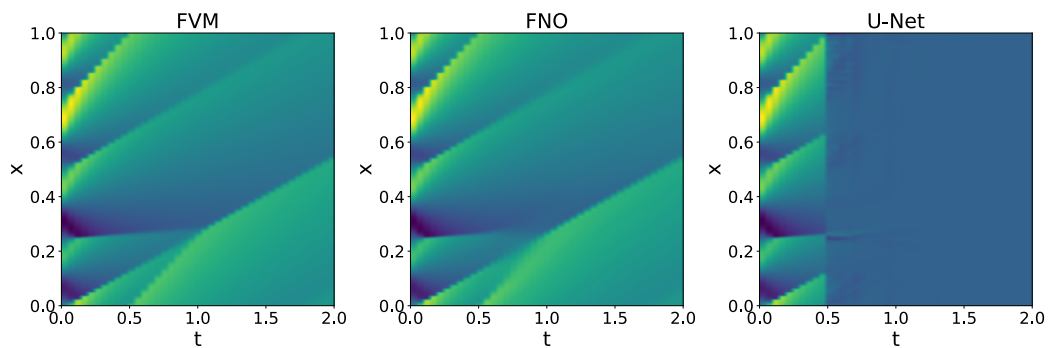

Figure 22: Plots of the predictions for 1D Burgers equation.

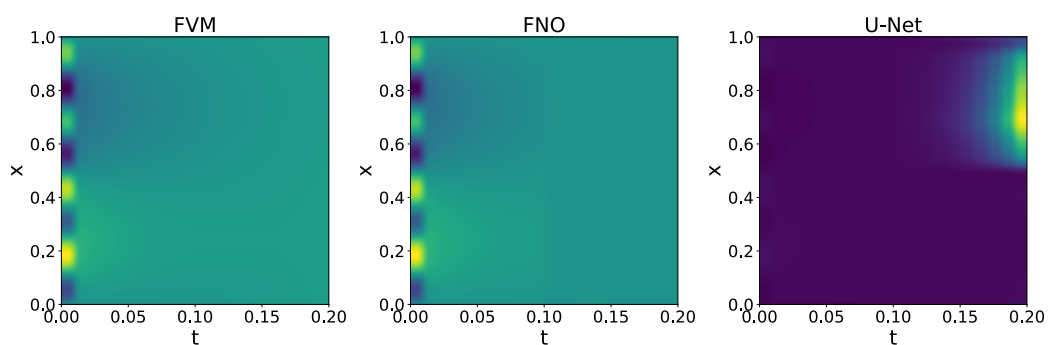

Figure 23: Plots of the predictions for 1D Reaction-Diffusion equation.

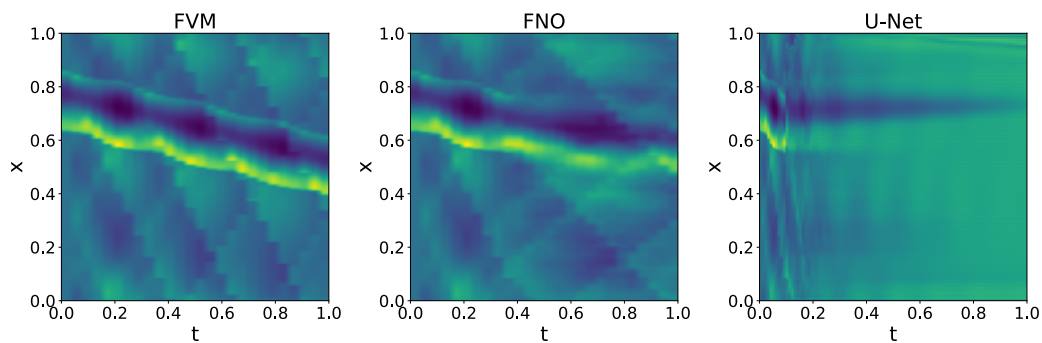

Figure 24: Plots of the predictions of density for 1D compressible NS equations.

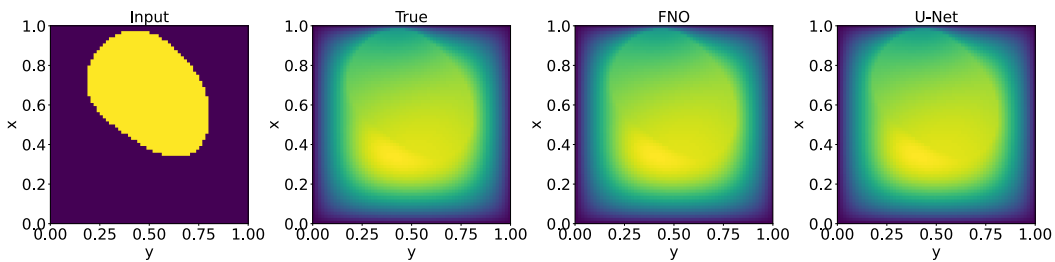

Figure 25: Plots of the predictions for 2D Darcy Flow.

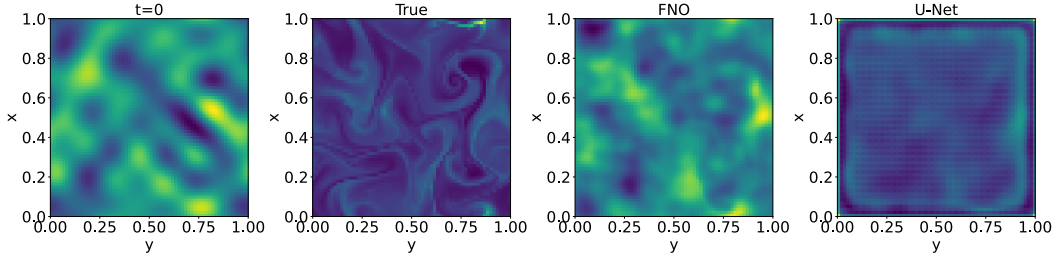

Figure 26: Plots of the predictions of the density for 2D compressible NS equations at the final time-step.

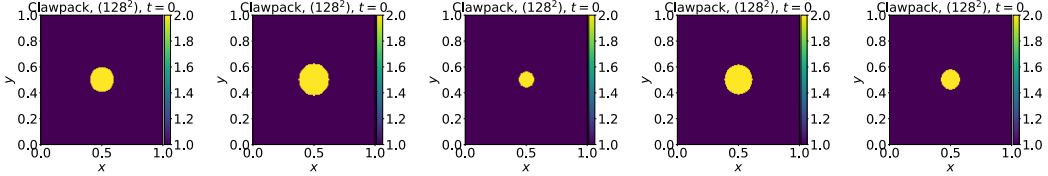

Figure 27: Visualization of the different radius of the initial perturbation used for the 2D shallow-water equations data.

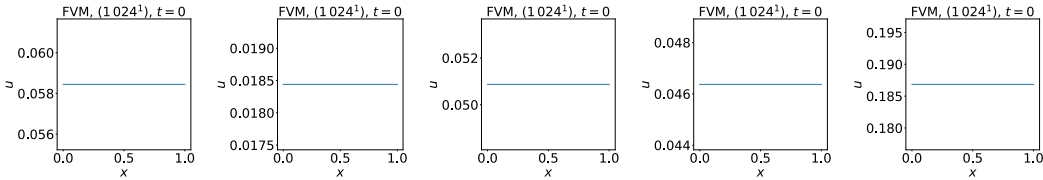

Figure 28: Visualization of the random uniform initial conditions used for the 1D diffusion-sorption equations data.

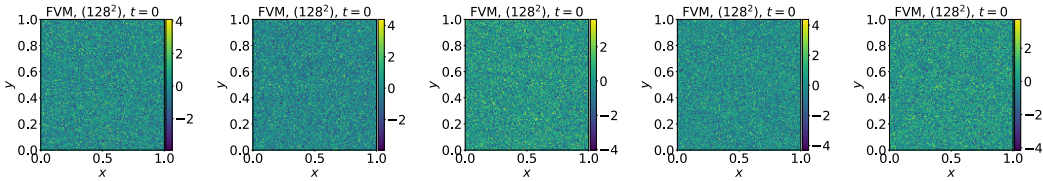

Figure 29: Visualization of the random initial conditions used for the 2D diffusion-reaction equations data.

of the 2D shallow-water equation data. [Figure 28](#) shows different random uniform initial condition used for five different samples of the 1D diffusion-sorption equation data. [Figure 29](#) shows different random noise used as the initial condition for five different samples of the 2D diffusion-reaction equation data.

In [Figure 30](#), we plotted the several samples of the initial condition for 1D Advection and Burgers equations. [Figure 31](#) is also the similar plot of the initial condition for 1D Diffusion-Reaction equation. Note that in this case the value of the scalar function is limited between 0 to 1 because of the form of the source term. Finally, we provided several samples of the 1D and 2D CFD cases in [Figure 32](#) and [Figure 33](#).

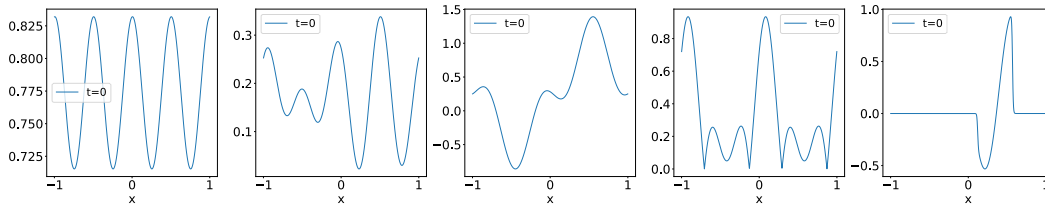

Figure 30: Visualization of the random initial conditions used for the 1D Advection/Burgers equations data.

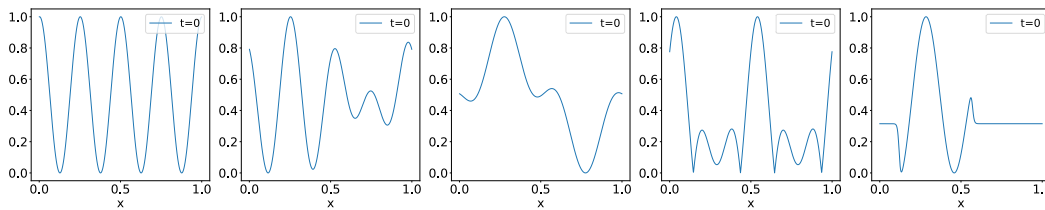

Figure 31: Visualization of the random initial conditions used for the 1D Reaction-Diffusion equations data.

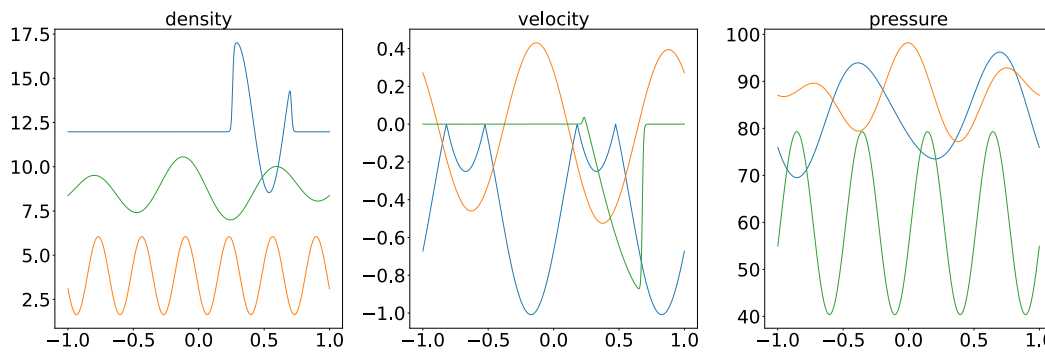

Figure 32: Visualization of the random initial conditions used for the 1D CFD data. The different colors mean the different samples.

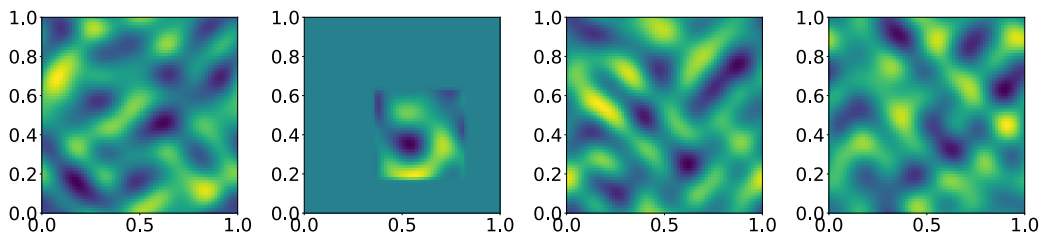

Figure 33: Visualization of the initial conditions of density used for the 2D CFD data.

## K PDEBENCH’s Data Sheet

In this section, we provide more detailed information about the DaRUS Dataverse which PDEBENCH uses to store its datasets. As explained in [subsection 3.5](#), DaRUS is the University of Stuttgart’s data repository based on the OpenSource Software DataVerse3, providing a place to archive, share, and publish the research data, scripts and source codes. All data uploaded to DaRUS gets a DOI as a persistent identifier, a license, and can be described with an extensive set of metadata, organized in metadata blocks. A dedicated team ensures that DaRUS is continuously maintained. PDEBENCH obtained a permanent DOI ([doi:10.18419/darus-2986](https://doi.org/10.18419/darus-2986)) [\[55\]](#) through DaRUS.

### K.1 Motivation

1. **For what purpose was the dataset created?** *Was there a specific task in mind? Was there a specific gap that needed to be filled? Please provide a description.*

PDEBENCH’s datasets were created to provide a more challenging and representative benchmark for scientific ML approaches, that is, machine learning methods to approximately simulate physical systems governed by PDEs. More details can be found in [section 1](#).

2. **Who created this dataset (e.g. which team, research group) and on behalf of which entity (e.g., company, institution, organization)?**

This dataset was created by Makoto Takamoto and Francesco Alesiani (senior researchers at NEC Labs Europe), Dan MacKinlay (postdoctoral researcher at CSIRO’s Data61), Timothy Praditia and Raphael Leiteritz (PhD students at the University of Stuttgart), Dirk Pflüger and Mathias Niepert (professors at the University of Stuttgart).

3. **Who funded the creation of the dataset?** *If there is an associated grant, please provide the name of the grantor and the grant name and number.*

Funding for the University of Stuttgart researchers was provided by the Deutsche Forschungsgemeinschaft (DFG, German Research Foundation) under Germany’s Excellence Strategy - EXC 2075 – 390740016, for the Cluster of Excellence on “Data-Integrated Simulation Science (SimTech)”.

4. **Any other comments?**

No

### K.2 Composition

1. **What do the instances that comprise the dataset represent (e.g. documents, photos, people, countries)?** *Are there multiple types of instances (e.g. movies, users, and ratings; people and interactions between them; nodes and edges)? Please provide a description.*

Each instance of the dataset is a simulation-generated array, containing the solutions (i.e. values of the variables of interest) of a specific partial differential equation (PDE). The details of the physical systems governed by PDEs can be found in [Appendix D](#) and the format of the data can be found in [subsection K.10](#).

2. **How many instances are there in total (of each type, if appropriate)?** An overview of the datasets and instances are provided in [Table 1](#). For the 1D diffusion-sorption equation, there is one file containing 10 000 samples, with 1 024 spatial cells, 101 time steps, and 1 variable. For the 2D diffusion-reaction equation, there is one file containing 1 000 samples, with  $128 \times 128$  spatial cells, 101 time steps, and 2 variables. For the 2D shallow-water equation, there is one file containing 1 000 samples, with  $128 \times 128$  spatial cells, 101 time steps, and 1 variable. For the advection, Burgers, and 1D-diffusion-reaction equation, each file contains 10 000 samples, with 1 024 spatial cells, 201 time steps, and 1 variable. The advection equation has 6 files for different parameters (advection velocity), the Burgers equation has 12 files for different parameters (diffusion coefficient), and the 1D diffusion-reaction equation has 16 files for different parameters (diffusion and source term coefficients). For the DarcyFlow, each file contains 10 000 samples, with  $128 \times 128$  spatial cells, 1 time step, and 2 variables. For the incompressible Navier-Stokes equations, the file contains 1 000 samples, with  $256 \times 256$  spatial cells, 1 000 time steps, and 2 variables. For the 1D compressible Navier-Stokes equations, the file contains 10 000 samples, with 1 024 spatial cells, 100 time steps, and 3 variables. For the 2D compressible Navier-Stokes equations,

the file contains 1 000 samples, with  $512 \times 512$  spatial cells, 21 time steps, and 4 variables. For the 3D compressible Navier-Stokes equations, the file contains 100 samples, with  $128 \times 128 \times 128$  spatial cells, 21 time steps, and 5 variables. The variation of parameters, initial conditions, and boundary conditions of the compressible Navier-Stokes equations are provided in [subsection D.5](#)

3. **Does the dataset contain all possible instances or is it a sample (not necessarily random) of instances from a larger set?** *If the dataset is a sample, then what is the larger set? Is the sample representative of the larger set (e.g. geographic coverage)? If so, please describe how this representativeness was validated/verified. If it is not representative of the larger set, please describe why not (e.g., to cover a more diverse range of instances, because instances were withheld or unavailable).*

The datasets that we provide are intended to be representative of challenging physical systems. Since this is a very broad and general scope, it is difficult, if not impossible, to represent it wholly. However, we provide datasets that contain longer time steps, non-linearly coupled variables, various challenging boundary conditions, different parameters, and more applicable to real-world scenarios than currently available. For more details, see [subsection 3.2](#) and [Appendix D](#).

4. **What data does each instance consist of?** *("Raw" data (e.g. unprocessed text or images) or features? In either case, please provide a description.)*

Each instance consists of numerical values in the form of an HDF5 file that correspond to the variables of interest in each specific physical system. See [Appendix D](#) for further details.

5. **Is there a label or target associated with each instance? If so, please provide a description.**

Each instance is an array, which elements are the values of a specific variable at a specific space and time (for the data format please refer to [subsection K.10](#)). These values are the target for the regression task performed by the baseline models. We also provide the full information of physical parameters for each dataset.

6. **Is any information missing from individual instances?** *(If so, please provide a description, explaining why this information is missing (e.g., because it was unavailable). This does not include intentionally removed information, but might include, e.g., redacted text.)*

No.

7. **Are relationships between individual instances made explicit (e.g., users' movie ratings, social network links)?** *(If so, please describe how these relationships are made explicit.)*

There are no relationships between different instances which were generated using randomly created initial conditions.

8. **Are there recommended data splits (e.g., training, development/validation, testing)?** *(If so, please provide a description of these splits, explaining the rationale behind them.)*

There are no recommendations for the data split. Users can experiment defining the data split as a hyperparameter. However, for the paper we use the split of 90% for training and the rest for validation and testing.

9. **Are there any errors, sources of noise, or redundancies in the dataset?** *(If so, please provide a description.)*

No. The only possible source of error might come from the discretization error, which should be minimal because our dataset was generated with a relatively high resolution. However, users can also generate their own dataset with the provided source code with even higher resolution.

10. **Is the dataset self-contained, or does it link to or otherwise rely on external resources (e.g., websites, tweets, other datasets)?** *(If it links to or relies on external resources, a) are there guarantees that they will exist, and remain constant, over time; b) are there official archival versions of the complete dataset (i.e., including the external resources as they existed at the time the dataset was created); c) are there any restrictions (e.g., licenses, fees) associated with any of the external resources that might apply to a future user? Please provide descriptions of all external resources and any restrictions associated with them, as well as links or other access points, as appropriate.)*

The dataset is available via a data repository (DaRUS) [\[10\]](#), which is maintained by the University of Stuttgart, and therefore will be available permanently.

11. **Does the dataset contain data that might be considered confidential (e.g., data that is protected by legal privilege or by doctor-patient confidentiality, data that includes the content of individuals' non-public communications)?** *(If so, please provide a description.)*  
No.
12. **Does the dataset contain data that, if viewed directly, might be offensive, insulting, threatening, or might otherwise cause anxiety?** *(If so, please describe why.)*  
No.
13. **Does the dataset relate to people?** *(If not, you may skip the remaining questions in this section.)*  
No.
14. **Does the dataset identify any subpopulations (e.g., by age, gender)?** *(If so, please describe how these subpopulations are identified and provide a description of their respective distributions within the dataset.)*  
N/A.
15. **Is it possible to identify individuals (i.e., one or more natural persons), either directly or indirectly (i.e., in combination with other data) from the dataset?** *(If so, please describe how.)*  
N/A.
16. **Does the dataset contain data that might be considered sensitive in any way (e.g., data that reveals racial or ethnic origins, sexual orientations, religious beliefs, political opinions or union memberships, or locations; financial or health data; biometric or genetic data; forms of government identification, such as social security numbers; criminal history)?** *(If so, please provide a description.)*  
N/A.
17. **Any other comments?**  
No.

### K.3 Collection Process

1. **How was the data associated with each instance acquired?** (Was the data directly observable (e.g., raw text, movie ratings), reported by subjects (e.g., survey responses), or indirectly inferred/derived from other data (e.g., part-of-speech tags, model-based guesses for age or language)? If data was reported by subjects or indirectly inferred/derived from other data, was the data validated/verified? If so, please describe how.)  
All the dataset were obtained by performing computationally expensive numerical simulations for each PDEs.
2. **What mechanisms or procedures were used to collect the data (e.g., hardware apparatus or sensor, manual human curation, software program, software API)?** (How were these mechanisms or procedures validated?)  
The numerical simulations were performed either using CPUs or GPUs with freely available Python libraries, such as Scipy.
3. **If the dataset is a sample from a larger set, what was the sampling strategy (e.g., deterministic, probabilistic with specific sampling probabilities)?**  
This is already mentioned above (F.2 "Composition"'s 3rd item).
4. **Who was involved in the data collection process (e.g., students, crowdworkers, contractors) and how were they compensated (e.g., how much were crowdworkers paid)?**  
All the data generation process (numerical simulation) was performed by the authors, mainly conducted by Makoto Takamoto, Timothy Praditia, Raphael Leiteritz, Dan MacKinlay and Francesco Alesiani. For a part of the simulations we received help by people at ANU Techlauncher who are acknowledged in "Acknowledgements".
5. **Over what timeframe was the data collected?** (Does this timeframe match the creation timeframe of the data associated with the instances (e.g., recent crawl of old news articles)? If not, please describe the timeframe in which the data associated with the instances was created.)

The dataset was generated from early to mid 2022. Because of the eternal nature of PDEs, our dataset is irrelevant to the timeframe of creation.

6. **Were any ethical review processes conducted (e.g., by an institutional review board)?** (If so, please provide a description of these review processes, including the outcomes, as well as a link or other access point to any supporting documentation.)  
No.
7. **Does the dataset relate to people?** (If not, you may skip the remaining questions in this section.)  
No
8. **Did you collect the data from the individuals in question directly, or obtain it via third parties or other sources (e.g., websites)?**  
No.
9. **Were the individuals in question notified about the data collection?** (If so, please describe (or show with screenshots or other information) how notice was provided, and provide a link or other access point to, or otherwise reproduce, the exact language of the notification itself.)  
N/A.
10. **Did the individuals in question consent to the collection and use of their data?** (If so, please describe (or show with screenshots or other information) how consent was requested and provided, and provide a link or other access point to, or otherwise reproduce, the exact language to which the individuals consented.)  
N/A.
11. **If consent was obtained, were the consenting individuals provided with a mechanism to revoke their consent in the future or for certain uses?** (If so, please provide a description, as well as a link or other access point to the mechanism (if appropriate).)  
N/A.
12. **Has an analysis of the potential impact of the dataset and its use on data subjects (e.g., a data protection impact analysis) been conducted?** (If so, please provide a description of this analysis, including the outcomes, as well as a link or other access point to any supporting documentation.)  
N/A.
13. Any other comments?  
None.

#### **K.4 Preprocessing/cleaning/labeling**

1. **Was any preprocessing/cleaning/labeling of the data done (e.g., discretization or bucketing, tokenization, part-of-speech tagging, SIFT feature extraction, removal of instances, processing of missing values)?** (If so, please provide a description. If not, you may skip the remainder of the questions in this section.)  
No. At most we rejected meaningless solutions because of the failure of numerical simulations, such as data with all zeros or Nan values.
2. **Was the "raw" data saved in addition to the preprocessed/cleaned/labeled data (e.g., to support unanticipated future uses)?** (If so, please provide a link or other access point to the "raw" data.)  
N/A.
3. **Is the software used to preprocess/clean/label the instances available?** (If so, please provide a link or other access point.)  
N/A.
4. **Any other comments?**  
None.

## K.5 Uses

1. **Has the dataset been used for any tasks already?** (If so, please provide a description.)  
Not yet.
2. **Is there a repository that links to any or all papers or systems that use the dataset?** (If so, please provide a link or other access point.)  
No.
3. **What (other) tasks could the dataset be used for?**  
The dataset could possibly be used for developing or testing ML models for fitting the out-of-distribution data, such as unseen physical parameters.
4. **Is there anything about the composition of the dataset or the way it was collected and preprocessed/cleaned/labeled that might impact future uses?** (For example, is there anything that a future user might need to know to avoid uses that could result in unfair treatment of individuals or groups (e.g., stereotyping, quality of service issues) or other undesirable harms (e.g., financial harms, legal risks) If so, please provide a description. Is there anything a future user could do to mitigate these undesirable harms?)  
Basically no. But high-dimensional data, in particular 3D data, has a relatively small number of samples, only 100, due of storage limitations and the very large size of single data points. This might result in ML models with insufficient accuracy, but it is realistic for scientific simulations, where extensive computation time can be required for a single data point. However, we emphasize that we provide the data generation source code. This allows future users to increase their dataset size as much as they need.
5. **Are there tasks for which the dataset should not be used?** (If so, please provide a description.)  
No.
6. **Any other comments?**  
None.

## K.6 Distribution

1. **Will the dataset be distributed to third parties outside of the entity (e.g., company, institution, organization) on behalf of which the dataset was created?** (If so, please provide a description.)  
Yes, the dataset is freely and publicly available and accessible.
2. **How will the dataset will be distributed (e.g., tarball on website, API, GitHub)?** (Does the dataset have a digital object identifier (DOI)?)  
The dataset is free for download either by directly accessing the DaRUS page <https://doi.org/10.18419/darus-2986> or making use of a Python API, "pyDaRUS", provided by DaRUS. An example of a code snippet for downloading the data is listed in [subsection 3.5](#).
3. **When will the dataset be distributed?**  
The dataset is distributed as of June 2022 in its first version.
4. **Will the dataset be distributed under a copyright or other intellectual property (IP) license, and/or under applicable terms of use (ToU)?** (If so, please describe this license and/or ToU, and provide a link or other access point to, or otherwise reproduce, any relevant licensing terms or ToU, as well as any fees associated with these restrictions.)  
The dataset is licensed under CC BY license.
5. **Have any third parties imposed IP-based or other restrictions on the data associated with the instances?** (If so, please describe these restrictions, and provide a link or other access point to, or otherwise reproduce, any relevant licensing terms, as well as any fees associated with these restrictions.)  
No
6. **Do any export controls or other regulatory restrictions apply to the dataset or to individual instances?** (If so, please describe these restrictions, and provide a link or other access point to, or otherwise reproduce, any supporting documentation.)  
No



## 7. Any other comments?

None.

## K.7 Maintenance

### 1. Who is supporting/hosting/maintaining the dataset?

The storage infrastructure, DaRUS, is maintained by the University of Stuttgart and a dedicated team of DaRUS. The dataset themselves are maintained by the authors.

### 2. How can the owner/curator/manager of the dataset be contacted (e.g., email address)?

E-mail addresses are provided in the main-body of the paper.

### 3. Is there an erratum? (If so, please provide a link or other access point.)

Currently, no. As errors are encountered, future versions of the dataset may be released. They will all be provided in the same github and DaRUS location.

### 4. Will the dataset be updated (e.g., to correct labeling errors, add new instances, delete instances)? (If so, please describe how often, by whom, and how updates will be communicated to users (e.g., mailing list, GitHub)?)

Same as previous.

### 5. If the dataset relates to people, are there applicable limits on the retention of the data associated with the instances (e.g., were individuals in question told that their data would be retained for a fixed period of time and then deleted)? (If so, please describe these limits and explain how they will be enforced.)

N/A.

### 6. Will older versions of the dataset continue to be supported/hosted/maintained? (If so, please describe how. If not, please describe how its obsolescence will be communicated to users.)

Versioning of the dataset is managed via DaRUS. Data can only be added. For additional information see <https://guides.dataverse.org/en/5.9/user/dataset-management.html#dataset-versions>

### 7. If others want to extend/augment/build on/contribute to the dataset, is there a mechanism for them to do so? (If so, please provide a description. Will these contributions be validated/verified? If so, please describe how. If not, why not? Is there a process for communicating/distributing these contributions to other users? If so, please provide a description.)

Errors may be submitted via the bugtracker on github.

### 8. Any other comments?

None.

## K.8 Reproducibility of the baseline score

We provide all the pretrained model in our DaRUS repository: <https://darus.uni-stuttgart.de/privateurl.xhtml?token=cd862f8c-8e1b-49d2-b4da-b35f8df5ac85>. So users can freely check our result or even continue longer training with the help of our APIs.

## K.9 Reading and using the dataset

The downloaded HDF5 files can easily be read by a standard software to read HDF5 files. Concerning the data size, 1D data have 4 - 20 GB, 2D data have 6 - 100 GB, 3D data have 60 - 80 GB, depending on PDEs and parameters. In our project home page <https://github.com/pdebench/PDEBench/blob/main/README.md>, we also provide APIs to read and store the data into PyTorch data loader, which could be directly used in the user's code or our providing ML model training APIs.

An example of snipped code for reading data is introduced in [subsection 3.5](#). Information on how to use the baseline and read the dataset is provided in the project home page.

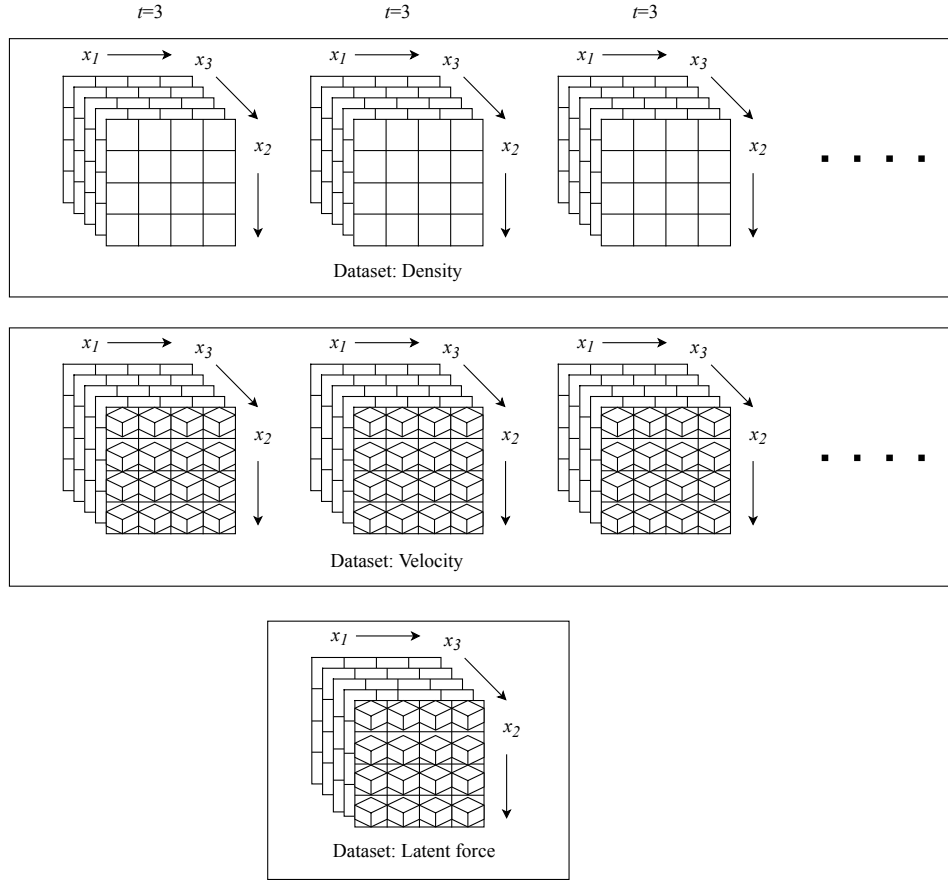

Figure 34: Example of data format for a PDE with density and velocity terms

## K.10 Data Format

Fig. 34 visualizes the data format of PDEBENCH.

Realizations are stored in HDF5 format, allowing typed storage of dense arrays on disk. File naming format is  $\{\text{PDE name}\}--\{\text{Parameters}\}--\{\text{Config}\}.h5$ . The HDF file contains a single group, documented in the source code for the generating PDE, which may contain multiple HDF5 datasets, corresponding to tensors.

Arrays are packed according to the convention  $(b \times t \times x_1 \cdots \times x_d \times v)$ , where  $b$  denotes the samples' dimension,  $t$  the time dimension,  $x_1, \dots, x_d$  the  $d$  spatial dimensions, and  $v$  the dimensions needed to encode the state of the system (e.g. a scalar density field has dimension one, a 2d velocity field might have dimension 2)<sup>11</sup>. Not all dimensions are present in all data sets; for example, some parameters are time-invariant, in which case the time dimension does not exist. For each file, simulation parameters are stored alongside the simulation runs as HDF5 attribute strings in YAML format encoded as UTF8.

<sup>11</sup> Concerning the compressible Navier-Stokes equations' dataset, each variable is provided independently, not summarized into a channel dimension (i.e. extending the array by 1 dimension), such as "density" and "pressure". This is to avoid too big array sizes, allowing memory efficient data I/O by sub-sampling spatial cells.
